# Supplementary material for: One-pot synthesis of 4-substituted isoquinolinium zwitterionic salts by metal-free C–H bond activation
Source: Royal Society of Chemistry journal article supplement (doi:10.1039/c2cc30708a), 2012-01-01
Supplement: c2cc30708a.pdf [file c2cc30708a.pdf]

# One-pot synthesis of 4-substituted isoquinolinium zwitterionic salts by Metal-free C-H bond activation

Hong Hou, Yuan Zhang, Chao-Guo Yan\*,

[\*] Prof. Dr. C. G. Yan, H. Hou, Y. Zhang

College of Chemistry & Chemical Engineering

Yangzhou University

Yangzhou 225002

E-mail: cgyan@yzu.edu.cn

## Supporting Information

### List of Contents

|                                                         |       |
|---------------------------------------------------------|-------|
| Experiment procedure.....                               | 1     |
| Crystal data of 4a, 4j, F.....                          | 2-3   |
| Characterization data:                                  |       |
| 4a-4s.....                                              | 4-9   |
| 5a-5f.....                                              | 10-11 |
| <sup>1</sup> H NMR and <sup>13</sup> C NMR spectra..... | 12-36 |

## Experiment Procedure

Reagents and solvents were commercial available with analytical grade. Melting points were determined on a hot-plate microscope apparatus and were uncorrected. Analytical thin-layer chromatography (TLC) was performed on Merck silica gel aluminium plates with GF-254 indicator, visualized by irradiation with UV light. IR spectra were obtained on a Bruker Tensor27 spectrometer (KBr disc).  $^1\text{H}$  NMR and  $^{13}\text{C}$  NMR spectra were measured with a Bruker AV-600 spectrover in  $\text{DMSO-}d_6$  with chemical shift ( $\delta$ ) given in ppm relative to TMS as interstandard [(s = singlet, d = doublet, t = triplet, m = multiplet), coupling constant (Hz)]. High-resolution mass (ESI) were obtained with a Bruker MicroTOF spectrometer. X-ray data were collected on a Bruker Smart APEX-2 CCD diffractometer.

## General procedure

### One-pot reaction for the synthesis of 4a-4s, 5a-5f.

Isoquinoline (3.0 mmol, 0.388 g) and benzyl bromide (2.2mmol) were stirred in ethanol (10 mL) at 50 °C for about three hours. Aromatic aldehyde **3** (2.0 mmol) and 1,3-dicarbonyl compound **4** (2.0 mmol) and triethylamine (3.0 mmol, 0.303 g) were then added to the solution, and the mixture was stirred at reflux for overnight (TLC monitoring). The resulting precipitates were collected by filtration, washed with alcohol and chloroform and dried to give the corresponding product **4a-4s**, **5a-5f**.

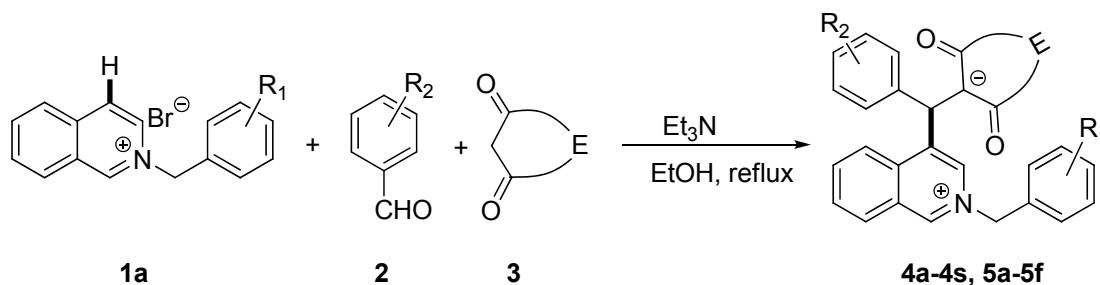

### Reaction of isoquinoline and *p*-nitrobenzyl bromide yields the dimer of the isoquinoline ylide (**F**).

Isoquinoline (3.0 mmol, 0.388 g) and *p*-nitrobenzyl bromide (2.2mmol) were stirred in ethanol (10 mL) at 50 °C for about three hours. Triethylamine (3.0 mmol, 0.303 g) were then added to the solution, and the mixture was stirred at reflux for one hour (TLC monitoring). The resulting precipitates were collected by filtration, washed with alcohol and dried to give the corresponding product **F**.

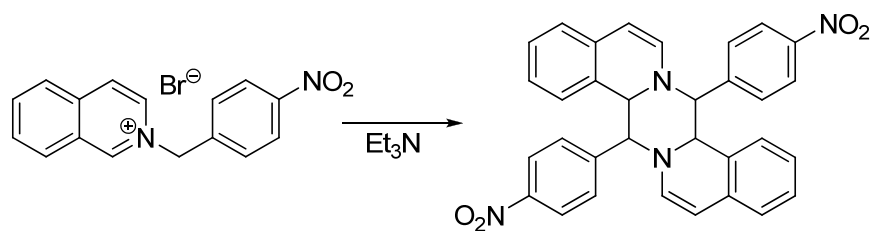

### Crystal Data:

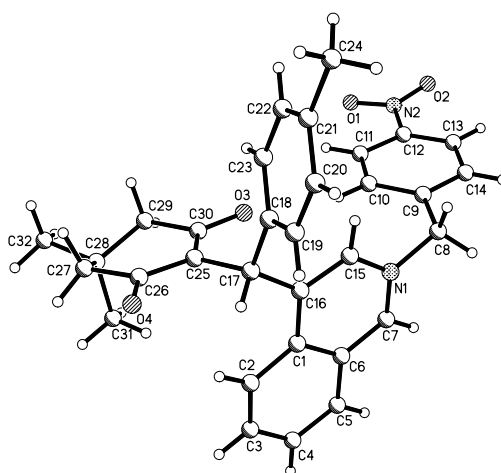

Fig. 1 X-ray structure of **4a**

Crystal data for **4a**:  $C_{32}H_{30}N_2O_4$ ,  $M_r = 506.58$ , monoclinic,  $a = 9.822(3) \text{ \AA}$ ,  $b = 12.203(4) \text{ \AA}$ ,  $c = 12.763(4) \text{ \AA}$ ,  $U = 1476.6(8) \text{ \AA}^3$ ,  $T = 296(2) \text{ K}$ , space group P -1,  $Z = 2$ , 12504 reflections measured, 6409 unique ( $R_{\text{int}} = 0.0671$ ) which were used in all calculations. The final  $wR (F^2)$  was 0.2677 (all data). CCDC 856821.

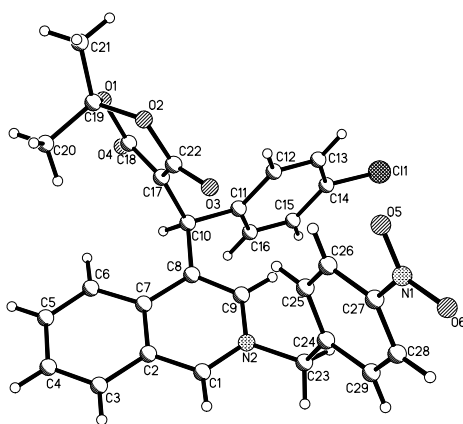

Fig. 2 X-ray structure of **4j**

Crystal data for **4j**:  $C_{29}H_{23}ClN_2O_6$ ,  $M_r = 530.94$ , monoclinic,  $a = 14.6580(19) \text{ \AA}$ ,  $b = 10.0334(13) \text{ \AA}$ ,  $c = 22.667(3) \text{ \AA}$ ,  $U = 3323.5(7) \text{ \AA}^3$ ,  $T = 296(2) \text{ K}$ , space group  $P 21/c$ ,  $Z = 4$ , 28869 reflections measured, 7785 unique ( $R_{\text{int}} = 0.0468$ ) which were used in all calculations. The final  $wR (F^2)$  was 0.1016 (all data). CCDC 856822.

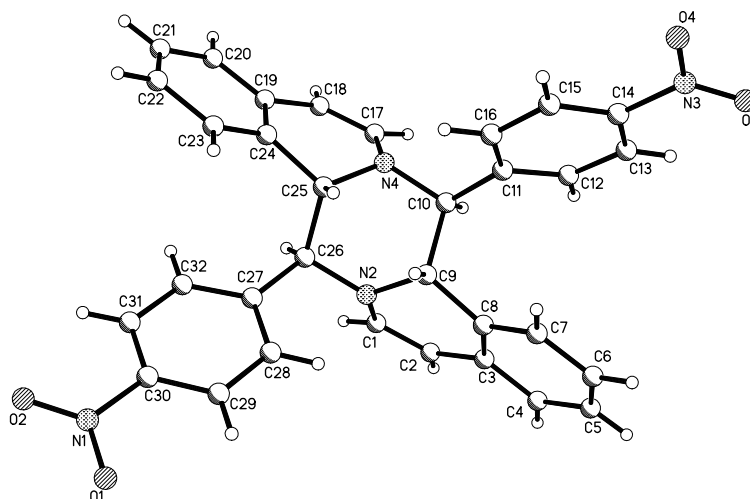

Fig 3 X-ray structure of **F**

Crystal data for **F**:  $C_{32}H_{26}N_4O_4$ ,  $M_r = 530.57$ , orthorhombic,  $a = 24.754(4) \text{ \AA}$ ,  $b = 7.9738(13) \text{ \AA}$ ,  $c = 13.336(2) \text{ \AA}$ ,  $U = 2632.4(7) \text{ \AA}^3$ ,  $T = 296(2) \text{ K}$ , space group  $P n a 21$ ,  $Z = 4$ , 22296 reflections measured, 3162 unique ( $R_{\text{int}} = 0.1396$ ) which were used in all calculations. The final  $wR (F^2)$  was 0.1396 (all data) CCDC 856823.

### Characterization data of the 4a-4s:

**4,4-dimethyl-1-((2-(4-nitrobenzyl)isoquinolinium-4-yl)(p-tolyl)methyl)-2,6-dioxocyclohexan-1-ide (4a):** Yellow solid, yield: 70%, m.p. 208-210 °C, IR (KBr)  $\nu = 3047, 2959, 2867, 1638, 1606, 1522, 1479, 1431, 1401, 1346, 1051, 995, 795 \text{ cm}^{-1}$ ;  $^1\text{H}$  NMR (600 MHz, DMSO- $d_6$ )  $\delta$  (ppm): 9.91 (s, 1H, ArH), 8.41 (d,  $J = 8.5$  Hz, 2H, ArH), 8.20 (d,  $J = 8.5$  Hz, 2H, ArH), 8.14 (t,  $J = 7.5$  Hz, 1H, ArH), 7.99-7.96 (m, 2H, ArH), 7.62 (d,  $J = 8.5$  Hz, 2H, ArH), 7.08 (d,  $J = 7.8$  Hz, 2H, ArH), 6.98 (d,  $J = 7.8$  Hz, 2H, ArH), 6.29 (s, 1H, CH), 6.09 (d,  $J = 13.0$  Hz, 1H, CH), 6.05 (d,  $J = 13.0$  Hz, 1H, CH), 2.23 (s, 3H, CH<sub>3</sub>), 1.99 (d,  $J = 15.9$  Hz, 2H, CH<sub>2</sub>), 1.92 (d,  $J = 15.9$  Hz, 2H, CH<sub>2</sub>), 0.81 (s, 6H, CH<sub>3</sub>);  $^{13}\text{C}$  NMR (150 MHz, DMSO- $d_6$ )  $\delta$ (ppm): 147.5, 146.3, 144.9, 141.6, 138.9, 136.6, 136.0, 135.5, 134.6, 130.6, 130.4, 129.6, 129.1, 128.4, 126.9, 124.5, 123.9, 110.6, 62.0, 49.4, 44.6, 31.2, 28.5, 20.6; MS ( $m/z$ ): 505.47 ([M-H]<sup>-</sup>, 100%); HRMS (ESI) Calcd. for C<sub>32</sub>H<sub>29</sub>N<sub>2</sub>O<sub>4</sub> ([M-H]<sup>-</sup>): 505.2127. Found: 505.2129.

**1-((4-methoxyphenyl)(2-(4-nitrobenzyl)isoquinolinium-4-yl)methyl)-4,4-dimethyl-2,6-dioxocyclohexan-1-ide (4b):** Yellow solid, yield: 76%, m.p. 196-198 °C, IR (KBr)  $\nu = 3418, 2951, 1639, 1607, 1479, 1401, 1347, 1245, 1178, 1145, 1029, 839, 796, 759 \text{ cm}^{-1}$ ;  $^1\text{H}$  NMR (600 MHz, DMSO- $d_6$ )  $\delta$  (ppm): 9.79 (s, 1H, ArH), 8.52 (d,  $J = 8.7$  Hz, 1H, ArH), 8.35 (d,  $J = 8.3$  Hz, 1H, ArH), 8.21 (d,  $J = 8.5$  Hz, 2H, ArH), 8.11 (t,  $J = 7.7$  Hz, 1H, ArH), 8.00 (s, 1H, ArH), 7.94 (t,  $J = 7.6$  Hz, 1H, ArH), 7.65 (d,  $J = 8.5$  Hz, 2H, ArH), 7.15 (d,  $J = 8.4$  Hz, 2H, ArH), 6.74 (d,  $J = 8.4$  Hz, 2H, ArH), 6.30 (s, 1H, CH), 6.07 (d,  $J = 15.0$  Hz, 1H, CH), 6.01 (d,  $J = 15.0$  Hz, 1H, CH), 3.70 (s, 3H, OCH<sub>3</sub>), 1.93 (d,  $J = 15.7$  Hz, 2H, CH<sub>2</sub>), 1.84 (d,  $J = 15.7$  Hz, 2H, CH<sub>2</sub>), 0.81 (s, 6H, CH<sub>3</sub>);  $^{13}\text{C}$  NMR (150 MHz, DMSO- $d_6$ )  $\delta$ (ppm): 157.3, 147.5, 145.5, 141.7, 136.7, 135.8, 135.7, 134.4, 130.4, 130.3, 130.2, 129.6, 126.9, 124.8, 123.9, 123.0, 65.0, 55.9, 54.8, 50.4, 31.1, 28.7, 18.5; MS ( $m/z$ ): 521.33 ([M-H]<sup>-</sup>, 100%); HRMS (ESI) Calcd. for C<sub>32</sub>H<sub>29</sub>N<sub>2</sub>O<sub>5</sub> ([M-H]<sup>-</sup>): 521.2076. Found: 521.2080.

**1-((4-isopropylphenyl)(2-(4-nitrobenzyl)isoquinolinium-4-yl)methyl)-4,4-dimethyl-2,6-dioxocyclohexan-1-ide (4c):** Yellow solid, yield: 71%, m.p. 220-222 °C, IR (KBr)  $\nu = 3413, 2956, 1638, 1605, 1480, 1399, 1347, 1264, 1144, 1053, 841, 793, 736 \text{ cm}^{-1}$ ;  $^1\text{H}$  NMR (600 MHz, DMSO- $d_6$ )  $\delta$  (ppm): 9.81 (s, 1H, ArH), 8.54 (d,  $J = 8.7$  Hz, 1H, ArH), 8.38 (d,  $J = 8.3$  Hz, 1H, ArH), 8.20 (d,  $J = 8.7$  Hz, 2H, ArH), 8.13 (t,  $J = 7.6$  Hz, 1H, ArH), 8.00 (s, 1H, ArH), 7.95 (t,  $J = 7.6$  Hz, 1H, ArH), 7.63 (d,  $J = 8.6$  Hz, 2H, ArH), 7.09 (d,  $J = 8.0$  Hz, 2H, ArH), 7.00 (d,  $J = 8.0$  Hz, 2H, ArH), 6.32 (s, 1H, CH), 6.06 (d,  $J = 15.1$  Hz, 1H, CH), 6.02 (d,  $J = 15.1$  Hz, 1H, CH), 2.82-2.76 (m, 1H, CH), 1.93 (d,  $J = 15.7$  Hz, 2H, CH<sub>2</sub>), 1.85 (d,  $J = 15.7$  Hz, 2H, CH<sub>2</sub>), 1.85-1.14 (m, 6H, CH<sub>3</sub>), 0.82 (s, 6H, CH<sub>3</sub>);  $^{13}\text{C}$  NMR (150 MHz, DMSO- $d_6$ )  $\delta$ (ppm): 147.5, 145.7, 145.4, 141.6, 139.8, 136.8, 135.9, 135.7, 130.4, 130.3, 129.7, 129.1, 126.9, 125.4, 124.8, 123.9, 62.1, 50.3, 32.9, 31.1, 28.7, 23.9, 23.8; MS ( $m/z$ ): 533.40 ([M-H]<sup>-</sup>, 100%); HRMS (ESI) Calcd. for C<sub>34</sub>H<sub>33</sub>N<sub>2</sub>O<sub>4</sub> ([M-H]<sup>-</sup>): 533.2440. Found: 533.2446.

**1-((4-tert-butylphenyl)(2-(4-nitrobenzyl)isoquinolinium-4-yl)methyl)-4,4-dimethyl-2,6-dioxocyclohexan-1-ide (4d):** Yellow solid, yield: 55%, m.p. 220 °C, IR (KBr)  $\nu = 3442, 2959, 1638, 1606, 1521, 1476, 1431, 1402, 1345, 1266, 1172, 1145, 854, 794,$

760, 735  $\text{cm}^{-1}$ ;  $^1\text{H}$  NMR (600 MHz,  $\text{DMSO-}d_6$ )  $\delta$  (ppm): 9.82 (s, 1H, ArH), 8.57 (d,  $J = 8.7$  Hz, 1H, ArH), 8.38 (d,  $J = 8.3$  Hz, 1H, ArH), 8.21 (d,  $J = 8.3$  Hz, 2H, ArH), 8.12 (t,  $J = 7.5$  Hz, 1H, ArH), 8.00 (s, 1H, ArH), 7.96 (t,  $J = 7.6$  Hz, 1H, ArH), 7.63 (d,  $J = 8.4$  Hz, 2H, ArH), 7.13 (d,  $J = 8.1$  Hz, 2H, ArH), 7.08 (d,  $J = 8.1$  Hz, 2H, ArH), 6.32 (s, 1H, CH), 6.05 (d,  $J = 15.0$  Hz, 1H, CH), 6.01 (d,  $J = 15.0$  Hz, 1H, CH), 1.94 (d,  $J = 15.7$  Hz, 2H,  $\text{CH}_2$ ), 1.85 (d,  $J = 15.7$  Hz, 2H,  $\text{CH}_2$ ), 1.23 (s, 9H,  $\text{CH}_3$ ), 0.82 (s, 6H,  $\text{CH}_3$ );  $^{13}\text{C}$  NMR (150 MHz,  $\text{DMSO-}d_6$ )  $\delta$ (ppm): 188.0, 147.6, 147.5, 145.7, 145.5, 141.4, 139.3, 136.7, 135.9, 135.6, 130.5, 130.3, 129.8, 128.8, 126.9, 124.7, 124.3, 123.9, 109.6, 62.1, 56.0, 50.2, 38.8, 33.8, 31.1, 31.0, 28.7, 18.4; MS ( $m/z$ ): 547.47 ( $[\text{M-H}]^-$ , 100%); HRMS (ESI) Calcd. for  $\text{C}_{35}\text{H}_{35}\text{N}_2\text{O}_4$  ( $[\text{M-H}]^-$ ): 547.2597. Found: 547.2601.

**1-((3-chlorophenyl)(2-(4-nitrobenzyl)isoquinolinium-4-yl)methyl)-4,4-dimethyl-2,6-dioxocyclohexan-1-ide (4e):** Yellow solid, yield: 60%, m.p. 218 °C, IR (KBr)  $\nu = 3443, 3004, 2945, 1637, 1603, 1567, 1522, 1398, 1345, 1288, 1194, 1145, 1045, 998, 792$   $\text{cm}^{-1}$ ;  $^1\text{H}$  NMR (600 MHz,  $\text{DMSO-}d_6$ )  $\delta$  (ppm): 9.84 (s, 1H, ArH), 8.53 (d,  $J = 8.7$  Hz, 1H, ArH), 8.38 (d,  $J = 8.3$  Hz, 1H, ArH), 8.22 (d,  $J = 8.7$  Hz, 2H, ArH), 8.13 (t,  $J = 7.7$  Hz, 1H, ArH), 8.09 (s, 1H, ArH), 7.96 (t,  $J = 7.6$  Hz, 1H, ArH), 7.67 (d,  $J = 8.6$  Hz, 2H, ArH), 7.23-7.14 (m, 4H, ArH), 6.37 (s, 1H, CH), 6.09 (d,  $J = 14.9$  Hz, 1H, CH), 6.04 (d,  $J = 14.9$  Hz, 1H, CH), 1.94 (d,  $J = 15.7$  Hz, 2H,  $\text{CH}_2$ ), 1.87 (d,  $J = 15.7$  Hz, 2H,  $\text{CH}_2$ ), 0.81 (s, 6H,  $\text{CH}_3$ );  $^{13}\text{C}$  NMR (150 MHz,  $\text{DMSO-}d_6$ )  $\delta$ (ppm): 147.6, 145.9, 145.6, 144.7, 141.7, 136.7, 135.9, 135.6, 132.4, 130.5, 130.4, 129.7, 129.4, 129.1, 127.9, 126.9, 125.5, 124.8, 123.9, 108.7, 62.0, 50.4, 31.2, 28.7; MS ( $m/z$ ): 525.40 ( $[\text{M-H}]^-$ , 100%); HRMS (ESI) Calcd. for  $\text{C}_{31}\text{H}_{26}\text{ClN}_2\text{O}_4$  ( $[\text{M-H}]^-$ ): 525.1581. Found: 525.1577.

**1-((4-fluorophenyl)(2-(4-nitrobenzyl)isoquinolinium-4-yl)methyl)-4,4-dimethyl-2,6-dioxocyclohexan-1-ide (4f):** Yellow solid, yield: 59%, m.p. 242-244 °C, IR (KBr)  $\nu = 3428, 2946, 1637, 1603, 1476, 1397, 1344, 1265, 855, 798, 764$   $\text{cm}^{-1}$ ;  $^1\text{H}$  NMR (600 MHz,  $\text{DMSO-}d_6$ )  $\delta$  (ppm): 9.80 (s, 1H, ArH), 8.52 (d,  $J = 8.7$  Hz, 1H, ArH), 8.37 (d,  $J = 8.3$  Hz, 1H, ArH), 8.22 (d,  $J = 8.3$  Hz, 2H, ArH), 8.13 (t,  $J = 7.8$  Hz, 1H, ArH), 8.03 (s, 1H, ArH), 7.95 (t,  $J = 7.6$  Hz, 1H, ArH), 7.66 (d,  $J = 8.3$  Hz, 2H, ArH), 7.26 (t,  $J = 6.6$  Hz, 2H, ArH), 7.00 (t,  $J = 8.5$  Hz, 2H, ArH), 6.35 (s, 1H, CH), 6.12 (d,  $J = 15.0$  Hz, 1H, CH), 6.04 (d,  $J = 15.0$  Hz, 1H, CH), 1.94 (d,  $J = 15.7$  Hz, 2H,  $\text{CH}_2$ ), 1.85 (d,  $J = 15.7$  Hz, 2H,  $\text{CH}_2$ ), 0.81 (s, 6H,  $\text{CH}_3$ );  $^{13}\text{C}$  NMR (150 MHz,  $\text{DMSO-}d_6$ )  $\delta$ (ppm): 187.2, 160.6 (d,  $J = 241.3$  Hz), 147.6, 145.6, 141.8, 138.9, 136.7, 135.7 (d,  $J = 3.4$  Hz), 131.2 (d,  $J = 7.6$  Hz), 130.3 (d,  $J = 7.6$  Hz), 129.6, 127.0, 124.9, 123.9, 114.2 (d,  $J = 20.7$  Hz), 109.4, 62.0, 50.6, 31.1, 28.8; MS ( $m/z$ ): 509.40 ( $[\text{M-H}]^-$ , 100%); HRMS (ESI) Calcd. for  $\text{C}_{31}\text{H}_{26}\text{FN}_2\text{O}_4$  ( $[\text{M-H}]^-$ ): 509.1877. Found: 509.1874.

**4,4-dimethyl-1-((2-(4-nitrobenzyl)isoquinolinium-4-yl)(phenyl)methyl)-2,6-dioxocyclohexan-1-ide (4g):** Yellow solid, yield: 81%, m.p. 219-221 °C, IR (KBr)  $\nu = 3441, 2992, 1638, 1577, 1521, 1435, 1392, 1344, 1258, 1107, 796$   $\text{cm}^{-1}$ ;  $^1\text{H}$  NMR (600 MHz,  $\text{DMSO-}d_6$ )  $\delta$  (ppm): 9.91 (s, 1H, ArH), 8.59 (d,  $J = 8.7$  Hz, 1H, ArH), 8.44 (d,  $J = 8.3$  Hz, 1H, ArH), 8.24 (t,  $J = 7.8$  Hz, 1H, ArH), 8.20 (d,  $J = 8.5$  Hz, 2H, ArH), 8.02 (t,  $J = 7.7$  Hz, 1H, ArH), 7.95 (s, 1H, ArH), 7.62 (d,  $J = 8.4$  Hz, 2H, ArH), 7.29 (d,  $J = 7.6$

Hz, 2H, ArH), 7.25 (t,  $J = 7.4$  Hz, 2H, ArH), 7.18 (t,  $J = 7.1$  Hz, 1H, ArH), 6.14-6.03 (m, 3H, CH, CH<sub>2</sub>), 1.36 (s, 6H, CH<sub>3</sub>); <sup>13</sup>C NMR (150 MHz, DMSO-*d*<sub>6</sub>) δ(ppm): 164.7, 147.6, 146.8, 144.3, 142.2, 141.5, 136.7, 136.5, 135.4, 130.9, 130.5, 129.5, 129.0, 127.9, 127.2, 125.9, 124.5, 123.9, 99.4, 75.5, 62.2, 41.3, 25.9; MS ( $m/z$ ): 495.27 ([M-H]<sup>+</sup>, 100%); HRMS (ESI) Calcd. for C<sub>29</sub>H<sub>23</sub>N<sub>2</sub>O<sub>6</sub> ([M-H]<sup>+</sup>): 495.1556. Found: 495.1561.

**4,4-dimethyl-1-((2-(4-nitrobenzyl)isoquinolinium-4-yl)(p-tolyl)methyl)-2,6-dioxocyclohexan-1-ide (4h):** Yellow solid, yield: 73%, m.p. 222-224 °C, IR (KBr)  $\nu = 3442, 2990, 1639, 1580, 1525, 1437, 1388, 1343, 1256, 1212, 857, 797$  cm<sup>-1</sup>; <sup>1</sup>H NMR (600 MHz, DMSO-*d*<sub>6</sub>) δ (ppm): 9.89 (s, 1H, ArH), 8.58 (d,  $J = 8.7$  Hz, 1H, ArH), 8.43 (d,  $J = 8.3$  Hz, 1H, ArH), 8.24-8.19 (m, 3H, ArH), 8.00 (t,  $J = 7.7$  Hz, 1H, ArH), 7.92 (s, 1H, ArH), 7.62 (d,  $J = 8.7$  Hz, 2H, ArH), 7.16 (d,  $J = 8.0$  Hz, 2H, ArH), 7.04 (d,  $J = 8.0$  Hz, 2H, ArH), 6.10-1.01 (m, 3H, CH, CH<sub>2</sub>), 2.26 (s, 3H, CH<sub>3</sub>), 1.36 (s, 6H, CH<sub>3</sub>); <sup>13</sup>C NMR (150 MHz, DMSO-*d*<sub>6</sub>) δ(ppm): 164.7, 147.6, 146.7, 144.5, 141.6, 139.2, 136.7, 136.4, 135.4, 134.8, 130.8, 130.5, 129.6, 128.9, 128.5, 127.1, 124.5, 123.8, 99.4, 75.6, 62.1, 40.9, 25.9, 20.6; MS ( $m/z$ ): 509.33 ([M-H]<sup>+</sup>, 100%); HRMS (ESI) Calcd. for C<sub>30</sub>H<sub>25</sub>N<sub>2</sub>O<sub>6</sub> ([M-H]<sup>+</sup>): 509.1713. Found: 509.1730.

**1-((4-methoxyphenyl)(2-(4-nitrobenzyl)isoquinolinium-4-yl)methyl)-4,4-dimethyl-2,6-dioxocyclohexan-1-ide (4i):** Yellow solid, yield: 85%, m.p. 197-199 °C, IR (KBr)  $\nu = 3425, 2994, 1581, 1514, 1391, 1347, 1253, 1204, 927, 794, 750$  cm<sup>-1</sup>; <sup>1</sup>H NMR (600 MHz, DMSO-*d*<sub>6</sub>) δ (ppm): 9.80 (s, 1H, ArH), 8.50 (d,  $J = 8.7$  Hz, 1H, ArH), 8.34 (d,  $J = 8.3$  Hz, 1H, ArH), 8.15-8.10 (m, 3H, ArH), 7.92 (t,  $J = 7.6$  Hz, 1H, ArH), 7.82 (s, 1H, ArH), 7.53 (d,  $J = 8.6$  Hz, 2H, ArH), 7.12 (d,  $J = 8.5$  Hz, 2H, ArH), 6.73 (d,  $J = 8.6$  Hz, 2H, ArH), 6.00 (d,  $J = 16.0$  Hz, 1H, CH), 5.94 (d,  $J = 16.0$  Hz, 1H, CH), 5.90 (s, 1H, CH), 3.63 (s, 3H, OCH<sub>3</sub>), 1.27 (s, 6H, CH<sub>3</sub>); <sup>13</sup>C NMR (150 MHz, DMSO-*d*<sub>6</sub>) δ(ppm): 164.8, 157.6, 147.6, 146.7, 144.8, 141.6, 136.7, 136.4, 135.4, 133.9, 130.8, 130.5, 130.0, 129.6, 127.2, 124.5, 123.8, 113.3, 99.4, 75.9, 62.1, 54.9, 40.6, 25.9; MS ( $m/z$ ): 525.33 ([M-H]<sup>+</sup>, 100%); HRMS (ESI) Calcd. for C<sub>30</sub>H<sub>25</sub>N<sub>2</sub>O<sub>7</sub> ([M-H]<sup>+</sup>): 525.1662. Found: 525.1662.

**1-((4-chlorophenyl)(2-(4-nitrobenzyl)isoquinolinium-4-yl)methyl)-4,4-dimethyl-2,6-dioxocyclohexan-1-ide (4j):** Yellow solid, yield: 77%, m.p. 196-198 °C, IR (KBr)  $\nu = 3440, 2991, 1577, 1391, 1346, 1257, 1206, 1095, 1016, 919, 794, 751$  cm<sup>-1</sup>; <sup>1</sup>H NMR (600 MHz, DMSO-*d*<sub>6</sub>) δ (ppm): 9.92 (s, 1H, ArH), 8.55 (d,  $J = 8.7$  Hz, 1H, ArH), 8.44 (d,  $J = 8.3$  Hz, 1H, ArH), 8.24-8.20 (m, 3H, ArH), 8.01 (t,  $J = 7.7$  Hz, 1H, ArH), 7.99 (s, 1H, ArH), 7.64 (d,  $J = 8.7$  Hz, 2H, ArH), 7.32 (s, 4H, ArH), 6.12 (d,  $J = 15.0$  Hz, 1H, CH), 6.07-6.04 (m, 2H, CH), 1.35 (s, 6H, CH<sub>3</sub>); <sup>13</sup>C NMR (150 MHz, DMSO-*d*<sub>6</sub>) δ(ppm): 164.7, 147.6, 147.1, 143.7, 141.6, 141.3, 136.6, 136.5, 135.4, 130.9, 130.6, 130.5, 129.6, 127.8, 127.2, 124.4, 123.9, 99.4, 75.3, 62.1, 40.8, 25.9; MS ( $m/z$ ): 529.33 ([M-H]<sup>+</sup>, 100%); HRMS (ESI) Calcd. for C<sub>29</sub>H<sub>22</sub>ClN<sub>2</sub>O<sub>6</sub> ([M-H]<sup>+</sup>): 529.1166. Found: 529.1167.

**1-((3-chlorophenyl)(2-(4-nitrobenzyl)isoquinolinium-4-yl)methyl)-4,4-dimethyl-2,6-dioxocyclohexan-1-ide (4k):** Yellow solid, yield: 71%, m.p. 204-206 °C, IR (KBr)

$\nu = 3447, 2990, 1639, 1578, 1521, 1390, 1347, 1258, 1201, 1112, 999, 791 \text{ cm}^{-1}$ ;  $^1\text{H}$  NMR (600 MHz, DMSO- $d_6$ )  $\delta$  (ppm): 9.94 (s, 1H, ArH), 8.55 (d,  $J = 8.7$  Hz, 1H, ArH), 8.45 (d,  $J = 8.3$  Hz, 1H, ArH), 8.23 (t,  $J = 8.2$  Hz, 1H, ArH), 8.22 (d,  $J = 8.8$  Hz, 2H, ArH), 8.02 (t,  $J = 7.7$  Hz, 1H, ArH), 7.98 (s, 1H, ArH), 7.64 (d,  $J = 8.7$  Hz, 2H, ArH), 7.30-7.22 (m, 4H, ArH), 6.13-6.03 (m, 3H, CH, CH<sub>2</sub>), 1.35 (s, 6H, CH<sub>3</sub>);  $^{13}\text{C}$  NMR (150 MHz, DMSO- $d_6$ )  $\delta$ (ppm): 164.7, 152.2, 147.2, 142.8, 136.5, 135.2, 132.7, 131.1, 130.5, 129.7, 129.6, 128.8, 127.7, 127.5, 127.4, 127.2, 126.0, 124.4, 123.9, 122.9, 99.5, 75.0, 62.1, 41.1, 25.9; MS ( $m/z$ ): 529.33 ([M-H]<sup>-</sup>, 100%); HRMS (ESI) Calcd. for C<sub>29</sub>H<sub>22</sub>ClN<sub>2</sub>O<sub>6</sub> ([M-H]<sup>-</sup>): 529.1166. Found: 529.1167.

**5-((2-(4-nitrobenzyl)isoquinolinium-4-yl)(phenyl)methyl)-2,4,6-trioxohexahydropyrimidin-5-ide (4l)**: Yellow solid, yield: 88%, m.p. 297-299 °C, IR (KBr)  $\nu = 3429, 1686, 1569, 1523, 1448, 1378, 1347, 1201, 1172, 776 \text{ cm}^{-1}$ ;  $^1\text{H}$  NMR (600 MHz, DMSO- $d_6$ )  $\delta$  (ppm): 9.96 (s, 1H, ArH), 9.24 (s, 2H, NH), 8.68 (d,  $J = 8.7$  Hz, 1H, ArH), 8.41 (d,  $J = 8.3$  Hz, 1H, ArH), 8.21-8.17 (m, 4H, ArH), 7.99-7.95 (m, 1H, ArH), 7.68 (d,  $J = 8.6$  Hz, 2H, ArH), 7.29 (d,  $J = 7.6$  Hz, 2H, ArH), 7.22 (t,  $J = 7.4$  Hz, 2H, ArH), 7.16 (t,  $J = 7.2$  Hz, 1H, ArH), 6.25 (s, 1H, CH), 6.09 (d,  $J = 15.0$  Hz, 1H, CH), 6.04 (d,  $J = 15.0$  Hz, 1H, CH);  $^{13}\text{C}$  NMR (150 MHz, DMSO- $d_6$ )  $\delta$ (ppm): 163.9, 152.1, 147.6, 146.3, 143.8, 141.9, 141.7, 135.9, 136.4, 135.9, 130.7, 130.4, 129.6, 129.0, 127.8, 127.2, 125.8, 124.5, 123.9, 85.4, 62.2, 40.2, 35.7, 30.7; MS ( $m/z$ ): 479.33 ([M-H]<sup>-</sup>, 100%); HRMS (ESI) Calcd. for C<sub>27</sub>H<sub>19</sub>N<sub>4</sub>O<sub>5</sub> ([M-H]<sup>-</sup>): 479.1355. Found: 479.1368.

**5-((2-(4-nitrobenzyl)isoquinolinium-4-yl)(p-tolyl)methyl)-2,4,6-trioxohexahydropyrimidin-5-ide (4m)**: Yellow solid, yield: 96%, m.p. 298-300 °C, IR (KBr)  $\nu = 3424, 1684, 1572, 1521, 1449, 1378, 1348, 1220, 1174, 791 \text{ cm}^{-1}$ ;  $^1\text{H}$  NMR (600 MHz, DMSO- $d_6$ )  $\delta$  (ppm): 9.84 (s, 1H, ArH), 9.22 (s, 1H, NH), 9.20 (s, 1H, NH), 8.67 (d,  $J = 8.7$  Hz, 1H, ArH), 8.40 (d,  $J = 8.3$  Hz, 1H, ArH), 8.20-8.15 (m, 4H, ArH), 7.97 (t,  $J = 7.6$  Hz, 1H, ArH), 7.68 (d,  $J = 8.7$  Hz, 2H, ArH), 7.16 (d,  $J = 7.9$  Hz, 2H, ArH), 7.01 (d,  $J = 7.9$  Hz, 2H, ArH), 6.19 (s, 1H, CH), 6.10 (d,  $J = 15.0$  Hz, 1H, CH), 6.03 (d,  $J = 15.0$  Hz, 1H, CH), 2.24 (s, 3H, CH<sub>3</sub>);  $^{13}\text{C}$  NMR (150 MHz, DMSO- $d_6$ )  $\delta$ (ppm): 164.4, 152.6, 148.1, 146.7, 144.4, 142.2, 139.4, 137.5, 136.9, 136.4, 135.2, 131.2, 130.9, 130.2, 129.4, 128.9, 127.7, 124.9, 124.4, 86.0, 62.7, 40.6, 21.0; MS ( $m/z$ ): 493.27 ([M-H]<sup>-</sup>, 100%); HRMS (ESI) Calcd. for C<sub>28</sub>H<sub>21</sub>N<sub>4</sub>O<sub>5</sub> ([M-H]<sup>-</sup>): 493.1512. Found: 493.1514.

**5-((4-chlorophenyl)(2-(4-nitrobenzyl)isoquinolinium-4-yl)methyl)-2,4,6-trioxohexahydropyrimidin-5-ide (4n)**: Yellow solid, yield: 96%, m.p. 289-291 °C, IR (KBr)  $\nu = 3426, 1686, 1572, 1523, 1488, 1449, 1380, 1349, 1221, 852 \text{ cm}^{-1}$ ;  $^1\text{H}$  NMR (600 MHz, DMSO- $d_6$ )  $\delta$  (ppm): 9.87 (s, 1H, ArH), 9.24 (s, 2H, NH), 8.67 (d,  $J = 8.7$  Hz, 1H, ArH), 8.41 (d,  $J = 8.3$  Hz, 1H, ArH), 8.22-8.17 (m, 4H, ArH), 7.98 (t,  $J = 7.6$  Hz, 1H, ArH), 7.70 (d,  $J = 8.7$  Hz, 2H, ArH), 7.32 (d,  $J = 8.5$  Hz, 2H, ArH), 7.28 (d,  $J = 8.5$  Hz, 2H, ArH), 6.23 (s, 1H, CH), 6.13 (d,  $J = 14.9$  Hz, 1H, CH), 6.03 (d,  $J = 14.9$  Hz, 1H, CH);  $^{13}\text{C}$  NMR (150 MHz, DMSO- $d_6$ )  $\delta$ (ppm): 164.1, 162.3, 152.1, 147.6, 146.5, 143.1, 141.7, 141.0, 136.9, 136.5, 135.9, 130.9, 130.8, 130.5, 130.4, 129.7, 127.7, 127.2, 124.4, 123.9, 85.2, 62.1, 35.7, 30.7; MS ( $m/z$ ): 513.27 ([M-H]<sup>-</sup>, 100%);



HRMS (ESI) Calcd. for  $C_{27}H_{18}ClN_4O_5$  ( $[M-H]^+$ ): 513.0966. Found: 513.0967.

**5-((4-fluorophenyl)(2-(4-nitrobenzyl)isoquinolinium-4-yl)methyl)-2,4,6-trioxohexahydropyrimidin-5-ide (4o)**: Yellow solid, yield: 90%, m.p. 263-265 °C, IR (KBr)  $\nu$  = 3422, 1686, 1572, 1521, 1447, 1377, 1220, 1159, 1047, 797  $cm^{-1}$ ;  $^1H$  NMR (600 MHz, DMSO- $d_6$ )  $\delta$  (ppm): 9.87 (s, 1H, ArH), 9.24 (s, 2H, NH), 8.66 (d,  $J$  = 8.7 Hz, 1H, ArH), 8.41 (d,  $J$  = 8.3 Hz, 1H, ArH), 8.22-8.16 (m, 4H, ArH), 7.98 (t,  $J$  = 7.6 Hz, 1H, ArH), 7.69 (d,  $J$  = 8.6 Hz, 2H, ArH), 7.33 (q,  $J$  = 8.0 Hz, 2H, ArH), 7.04 (t,  $J$  = 8.8 Hz, 2H, ArH), 6.23 (s, 1H, CH), 6.12 (d,  $J$  = 14.9 Hz, 1H, CH), 6.03 (d,  $J$  = 14.9 Hz, 1H, CH);  $^{13}C$  NMR (150 MHz, DMSO- $d_6$ )  $\delta$ (ppm): 164.0, 160.6 (d,  $J$  = 239.8 Hz), 152.1, 147.6, 146.4, 143.6, 141.7, 138.0 (d,  $J$  = 2.6 Hz), 136.9, 136.4, 135.8, 130.9 (d,  $J$  = 7.9 Hz), 130.7, 130.4, 129.6, 127.2, 124.4, 123.9, 114.4 (d,  $J$  = 21.0 Hz), 104.3, 85.6, 62.1; MS ( $m/z$ ): 497.33 ( $[M-H]^+$ , 100%); HRMS (ESI) Calcd. for  $C_{27}H_{18}FN_4O_5$  ( $[M-H]^+$ ): 497.1261. Found: 497.1259.

**5-((2-(4-nitrobenzyl)isoquinolinium-4-yl)(3-nitrophenyl)methyl)-2,4,6-trioxohexahydropyrimidin-5-ide (4p)**: Yellow solid, yield: 92%, m.p. 270-272 °C, IR (KBr)  $\nu$  = 3419, 1681, 1573, 1525, 1449, 1379, 1349, 1251, 1171, 780  $cm^{-1}$ ;  $^1H$  NMR (600 MHz, DMSO- $d_6$ )  $\delta$  (ppm): 9.91 (s, 1H, ArH), 9.31 (s, 2H, NH), 8.70 (d,  $J$  = 8.7 Hz, 1H, ArH), 8.43 (d,  $J$  = 8.3 Hz, 1H, ArH), 8.24-8.18 (m, 4H, ArH), 8.08 (d,  $J$  = 8.0 Hz, 1H, ArH), 8.00 (t,  $J$  = 7.6 Hz, 1H, ArH), 7.95 (s, 1H, ArH), 7.73 (d,  $J$  = 7.7 Hz, 1H, ArH), 7.70 (d,  $J$  = 8.7 Hz, 2H, ArH), 7.55 (t,  $J$  = 7.9 Hz, 1H, ArH), 6.37 (s, 1H, CH), 6.11 (d,  $J$  = 14.8 Hz, 1H, CH), 6.03 (d,  $J$  = 14.9 Hz, 1H, CH);  $^{13}C$  NMR (150 MHz, DMSO- $d_6$ )  $\delta$ (ppm): 164.0, 162.3, 152.1, 147.7, 147.6, 146.9, 144.5, 142.6, 141.7, 136.5, 136.0, 135.7, 130.8, 130.5, 129.6, 129.2, 127.3, 124.5, 123.8, 121.1, 84.6, 62.1, 35.7, 30.7; MS ( $m/z$ ): 524.33 ( $[M-H]^+$ , 100%); HRMS (ESI) Calcd. for  $C_{27}H_{18}N_5O_7$  ( $[M-H]^+$ ): 524.1206. Found: 524.1205.

**1,3-dimethyl-5-((2-(4-nitrobenzyl)isoquinolinium-4-yl)(phenyl)methyl)-2,4,6-trioxohexahydropyrimidin-5-ide (4q)**: Yellow solid, yield: 89%, m.p. 267-269 °C, IR (KBr)  $\nu$  = 3056, 2997, 1674, 1638, 1600, 1567, 1519, 1428, 1325, 1263, 1110, 997, 798  $cm^{-1}$ ;  $^1H$  NMR (600 MHz, DMSO- $d_6$ )  $\delta$  (ppm): 9.89 (s, 1H, ArH), 8.63 (d,  $J$  = 8.6 Hz, 1H, ArH), 8.43 (d,  $J$  = 8.3 Hz, 1H, ArH), 8.22-8.20 (m, 4H, ArH), 7.98 (t,  $J$  = 7.5 Hz, 1H, ArH), 7.67 (d,  $J$  = 8.2 Hz, 2H, ArH), 7.24-7.09 (m, 4H, ArH), 7.15 (t,  $J$  = 6.7 Hz, 1H, ArH), 6.36 (s, 1H, CH), 6.09 (q,  $J$  = 14.9 Hz, 2H, CH), 3.02 (s, 6H,  $CH_3$ );  $^{13}C$  NMR (150 MHz, DMSO- $d_6$ )  $\delta$ (ppm): 161.8, 152.8, 147.6, 146.5, 143.4, 141.9, 141.6, 136.9, 136.6, 136.0, 130.8, 130.4, 129.7, 128.9, 127.8, 127.2, 125.8, 124.3, 123.8, 85.6, 62.2, 40.9, 26.9; MS ( $m/z$ ): 507.39 ( $[M-H]^+$ , 100%); HRMS (ESI) Calcd. for  $C_{29}H_{23}N_4O_5$  ( $[M-H]^+$ ): 507.1668. Found: 507.1675.

**1,3-dimethyl-5-((2-(4-nitrobenzyl)isoquinolinium-4-yl)(p-tolyl)methyl)-2,4,6-trioxohexahydropyrimidin-5-ide (4r)**: Yellow solid, yield: 92%, m.p. 284 °C, IR (KBr)  $\nu$  = 3007, 1670, 1638, 1575, 1518, 1429, 1305, 1265, 1111, 787  $cm^{-1}$ ;  $^1H$  NMR (600 MHz, DMSO- $d_6$ )  $\delta$  (ppm): 9.88 (s, 1H, ArH), 8.61 (d,  $J$  = 8.7 Hz, 1H, ArH), 8.42 (d,  $J$  = 8.3 Hz, 1H, ArH), 8.22-8.17 (m, 4H, ArH), 7.98 (t,  $J$  = 7.8 Hz, 1H, ArH), 7.67 (d,  $J$  = 8.4 Hz, 2H, ArH), 7.10 (d,  $J$  = 7.7 Hz, 2H, ArH), 7.00 (d,  $J$  = 7.7 Hz, 2H, ArH), 6.31

(s, 1H, CH), 6.12 (d,  $J = 15.0$  Hz, 1H, CH), 6.05 (d,  $J = 14.9$  Hz, 1H, CH), 3.01 (s, 6H, CH<sub>3</sub>), 2.24 (s, 3H, CH<sub>3</sub>); <sup>13</sup>C NMR (150 MHz, DMSO-*d*<sub>6</sub>) δ(ppm): 161.8, 152.8, 147.6, 146.4, 143.6, 141.6, 138.8, 136.9, 136.5, 136.0, 134.6, 130.8, 130.4, 129.8, 128.8, 128.4, 127.1, 124.2, 123.8, 85.8, 62.1, 55.9, 40.6, 26.9, 20.5, 18.5; MS ( $m/z$ ): 521.39 ([M-H]<sup>-</sup>, 100%); HRMS (ESI) Calcd. for C<sub>30</sub>H<sub>25</sub>N<sub>4</sub>O<sub>5</sub> ([M-H]<sup>-</sup>): 521.1825. Found: 521.1833.

**5-((4-chlorophenyl)(2-(4-nitrobenzyl)isoquinolinium-4-yl)methyl)-1,3-dimethyl-2,4,6-trioxohexahydropyrimidin-5-ide (4s):** Yellow solid, yield: 83%, m.p. 272-274 °C, IR (KBr)  $\nu = 2984, 1672, 1638, 1574, 152, 1430, 1346, 1304, 1181, 1090, 855, 779$  cm<sup>-1</sup>; <sup>1</sup>H NMR (600 MHz, DMSO-*d*<sub>6</sub>) δ (ppm): 9.90 (s, 1H, ArH), 8.60 (d,  $J = 8.6$  Hz, 1H, ArH), 8.43 (d,  $J = 8.3$  Hz, 1H, ArH), 8.23-8.19 (m, 4H, ArH), 7.99 (t,  $J = 7.6$  Hz, 1H, ArH), 7.68 (d,  $J = 8.3$  Hz, 2H, ArH), 7.26 (t,  $J = 9.7$  Hz, 4H, ArH), 6.34 (s, 1H, CH), 6.14 (d,  $J = 14.8$  Hz, 1H, CH), 6.07 (d,  $J = 14.8$  Hz, 1H, CH), 3.02 (s, 6H, CH<sub>3</sub>); <sup>13</sup>C NMR (150 MHz, DMSO-*d*<sub>6</sub>) δ(ppm): 161.8, 152.8, 147.6, 146.7, 142.9, 141.7, 141.0, 136.9, 136.6, 136.0, 130.8, 130.5, 130.4, 129.7, 127.7, 127.2, 124.3, 123.8, 85.4, 62.1, 40.5, 26.9; MS ( $m/z$ ): 541.34 ([M-H]<sup>-</sup>, 100%); HRMS (ESI) Calcd. for C<sub>29</sub>H<sub>22</sub>ClN<sub>4</sub>O<sub>5</sub> ([M-H]<sup>-</sup>): 541.1279. Found: 541.1283.

### Characterization data of the 5a-5f:

**5-((2-benzylisoquinolinium-4-yl)(p-tolyl)methyl)-2,2-dimethyl-4,6-dioxo-1,3-dioxan-5-ide (5a):** yellow solid, yield: 78%, m.p. 294 °C, IR (KBr)  $\nu = 3448, 2991, 1639, 1588, 1509, 1446, 1389, 1257, 1201, 1101, 792, 749 \text{ cm}^{-1}$ ;  $^1\text{H}$  NMR (600 MHz, DMSO- $d_6$ )  $\delta$  (ppm): 9.88 (s, 1H, ArH), 8.55 (d,  $J = 8.7 \text{ Hz}$ , 1H, ArH), 8.43 (d,  $J = 8.3 \text{ Hz}$ , 1H, ArH), 8.19 (t,  $J = 7.8 \text{ Hz}$ , 1H, ArH), 8.00-7.97 (m, 2H, ArH), 7.38-7.35 (m, 5H, ArH), 7.16 (d,  $J = 7.9 \text{ Hz}$ , 2H, ArH), 7.05 (d,  $J = 7.9 \text{ Hz}$ , 2H, ArH), 6.00 (s, 1H, CH), 5.88 (d,  $J = 14.4 \text{ Hz}$ , 1H, CH), 5.84 (d,  $J = 14.4 \text{ Hz}$ , 1H, CH), 2.29 (s, 3H, CH<sub>3</sub>), 1.36 (s, 6H, CH<sub>3</sub>);  $^{13}\text{C}$  NMR (150 MHz, DMSO- $d_6$ )  $\delta$ (ppm): 164.7, 146.2, 144.3, 139.3, 136.6, 136.2, 135.4, 134.8, 134.4, 130.7, 130.4, 128.9, 128.8, 128.5, 128.3, 127.1, 99.3, 79.1, 75.7, 63.3, 40.9, 25.9, 20.6; MS ( $m/z$ ): 464.40 ([M-H]<sup>-</sup>, 100%); HRMS (ESI) Calcd. for C<sub>30</sub>H<sub>26</sub>NO<sub>4</sub> ([M-H]<sup>-</sup>): 464.1862. Found: 464.1872.

**5-((2-benzylisoquinolinium-4-yl)(p-tolyl)methyl)-2,4,6-trioxohexahydropyrimidin-5-ide (5b):** Yellow solid, yield: 89%, m.p. 296-298 °C, IR (KBr)  $\nu = 3451, 2821, 1567, 1460, 1382, 1298, 1123, 881, 831, 792 \text{ cm}^{-1}$ ;  $^1\text{H}$  NMR (600 MHz, DMSO- $d_6$ )  $\delta$  (ppm): 9.84 (s, 1H, ArH), 9.01 (s, 2H, NH), 8.62 (d,  $J = 8.7 \text{ Hz}$ , 1H, ArH), 8.41 (d,  $J = 8.3 \text{ Hz}$ , 1H, ArH), 8.19 (s, 1H, ArH), 8.16 (t,  $J = 7.7 \text{ Hz}$ , 1H, ArH), 7.97 (t,  $J = 7.7 \text{ Hz}$ , 1H, ArH), 7.39-7.37 (m, 5H, ArH), 7.16 (d,  $J = 7.9 \text{ Hz}$ , 2H, ArH), 7.03 (d,  $J = 7.9 \text{ Hz}$ , 2H, ArH), 6.16 (s, 1H, CH), 5.89 (d,  $J = 14.4 \text{ Hz}$ , 1H, CH), 5.83 (d,  $J = 14.3 \text{ Hz}$ , 1H, CH), 2.28 (s, 3H, CH<sub>3</sub>); The  $^{13}\text{C}$  NMR spectroscopy of product can't be obtained due to it's bad solubility. MS ( $m/z$ ): 448.17 ([M-H]<sup>-</sup>, 100%); HRMS (ESI) Calcd. for C<sub>28</sub>H<sub>22</sub>N<sub>3</sub>O<sub>3</sub> ([M-H]<sup>-</sup>): 448.1661. Found: 448.1671.

**5-((2-benzylisoquinolinium-4-yl)(p-tolyl)methyl)-1,3-dimethyl-2,4,6-trioxohexahydropyrimidin-5-ide (5c):** Yellow solid, yield: 70%, m.p. 306-308 °C, IR (KBr)  $\nu = 3425, 3237, 1670, 1578, 1508, 1426, 1264, 1171, 1040, 797, 783, 760 \text{ cm}^{-1}$ ;  $^1\text{H}$  NMR (600MHz, DMSO- $d_6$ )  $\delta$  (ppm): 9.87 (s, 1H, ArH), 8.58 (d,  $J = 8.7 \text{ Hz}$ , 1H, ArH), 8.41 (d,  $J = 8.3 \text{ Hz}$ , 1H, ArH), 8.27 (s, 1H, ArH), 8.17 (t,  $J = 7.7 \text{ Hz}$ , 1H, ArH), 7.96 (t,  $J = 7.6 \text{ Hz}$ , 1H, ArH), 7.42-7.40 (m, 2H, ArH), 7.37-7.36 (m, 3H, ArH), 7.10 (d,  $J = 7.9 \text{ Hz}$ , 2H, ArH), 7.02 (d,  $J = 7.9 \text{ Hz}$ , 2H, ArH), 6.29 (s, 1H, CH), 5.91 (d,  $J = 14.3 \text{ Hz}$ , 1H, CH), 5.85 (d,  $J = 14.3 \text{ Hz}$ , 1H, CH), 3.02 (s, 6H, CH<sub>3</sub>), 2.27 (s, 3H, CH<sub>3</sub>); The  $^{13}\text{C}$  NMR spectroscopy of product can't be obtained due to it's bad solubility; MS ( $m/z$ ): 476.13 ([M-H]<sup>-</sup>, 100%); HRMS (ESI) Calcd. for C<sub>30</sub>H<sub>26</sub>N<sub>3</sub>O<sub>3</sub> ([M-H]<sup>-</sup>): 476.1974. Found: 476.1985.

**4,4-dimethyl-1-((2-(4-methylbenzyl)isoquinolinium-4-yl)(p-tolyl)methyl)-2,6-dioxocyclohexan-1-ide (5d):** Yellow solid, yield: 64%, m.p. 246-248 °C, IR (KBr)  $\nu = 3461, 2951, 1638, 1608, 1567, 1477, 1398, 1268, 1172, 1147, 816, 790 \text{ cm}^{-1}$ ;  $^1\text{H}$  NMR (600 MHz, CDCl<sub>3</sub>)  $\delta$  (ppm): 9.29 (s, 1H, ArH), 8.63 (d,  $J = 8.0 \text{ Hz}$ , 1H, ArH), 8.07 (d,  $J = 7.7 \text{ Hz}$ , 1H, ArH), 8.00 (s, 1H, ArH), 7.95 (d,  $J = 7.7 \text{ Hz}$ , 1H, ArH), 7.70 (t,  $J = 7.6 \text{ Hz}$ , 1H, ArH), 7.13-7.08 (m, 6H, ArH), 6.98 (d,  $J = 7.6 \text{ Hz}$ , 2H, ArH), 6.44 (s, 1H, CH), 5.56 (d,  $J = 14.0 \text{ Hz}$ , 1H, CH), 5.37 (d,  $J = 14.0 \text{ Hz}$ , 1H, CH), 2.31 (s, 3H, CH<sub>3</sub>), 2.30 (s, 3H, CH<sub>3</sub>), 2.21 (d,  $J = 16.2 \text{ Hz}$ , 2H, CH<sub>2</sub>), 2.13 (d,  $J = 16.1 \text{ Hz}$ , 2H, CH<sub>2</sub>), 0.94 (s, 6H, CH<sub>3</sub>);  $^{13}\text{C}$  NMR (150 MHz, DMSO- $d_6$ )  $\delta$ (ppm): 140.1, 137.6,

136.2, 135.9, 135.6, 130.4, 130.2, 129.4, 129.1, 129.0, 128.9, 127.4, 125.9, 111.7, 64.1, 58.3, 40.7, 31.6, 28.8, 21.2, 21.0, 18.4; MS (*m/z*): 474.44 ([M-H]<sup>-</sup>, 100%); HRMS (ESI) Calcd. for C<sub>33</sub>H<sub>32</sub>NO<sub>2</sub> ([M-H]<sup>-</sup>): 474.2433. Found: 474.2434.

**4,4-dimethyl-1-((2-(4-methylbenzyl)isoquinolinium-4-yl)(p-tolyl)methyl)-2,6-dioxocyclohexan-1-ide (5e)**: Yellow solid, yield: 88%, m.p. 220-222 °C, IR (KBr)  $\nu$  = 3451, 2987, 1584, 1511, 1440, 1386, 1257, 1206, 1168, 1097, 817, 790 cm<sup>-1</sup>; <sup>1</sup>H NMR (600 MHz, DMSO-*d*<sub>6</sub>)  $\delta$  (ppm): 9.88 (s, 1H, ArH), 8.50 (d, *J* = 8.6 Hz, 1H, ArH), 8.44 (d, *J* = 8.3 Hz, 1H, ArH), 8.19 (t, *J* = 7.6 Hz, 1H, ArH), 7.99-7.97 (m, 2H, ArH), 7.31-7.26 (m, 6H, ArH), 7.17 (d, *J* = 7.8 Hz, 2H, ArH), 6.02 (s, 1H, CH), 5.85 (d, *J* = 14.2 Hz, 1H, CH), 5.80 (d, *J* = 14.1 Hz, 1H, CH), 2.29 (s, 3H, CH<sub>3</sub>), 1.35 (s, 6H, CH<sub>3</sub>); <sup>13</sup>C NMR (150 MHz, DMSO-*d*<sub>6</sub>)  $\delta$ (ppm): 164.7, 146.0, 144.2, 139.3, 138.4, 136.5, 136.1, 135.3, 134.7, 131.4, 130.7, 130.5, 129.4, 128.9, 128.5, 127.1, 124.4, 99.3, 75.6, 63.2, 41.0, 25.9, 20.7, 20.6; MS (*m/z*): 478.39 ([M-H]<sup>-</sup>, 100%); HRMS (ESI) Calcd. for C<sub>31</sub>H<sub>28</sub>NO<sub>4</sub> ([M-H]<sup>-</sup>): 478.2018. Found: 478.2021.

**1-((4-chlorophenyl)(2-(4-methylbenzyl)isoquinolinium-4-yl)methyl)-4,4-dimethyl-2,6-dioxocyclohexan-1-ide (5f)**: Yellow solid, yield: 81%, m.p. 226-228 °C, IR (KBr)  $\nu$  = 3450, 2987, 1639, 1582, 1492, 1287, 1257, 1203, 1170, 1093, 917, 793 cm<sup>-1</sup>; <sup>1</sup>H NMR (600 MHz, DMSO-*d*<sub>6</sub>)  $\delta$  (ppm): 9.88 (s, 1H, ArH), 8.50 (d, *J* = 8.6 Hz, 1H, ArH), 8.44 (d, *J* = 8.3 Hz, 1H, ArH), 8.19 (t, *J* = 7.6 Hz, 1H, ArH), 7.99-7.97 (m, 2H, ArH), 7.31-7.26 (m, 6H, ArH), 7.17 (d, *J* = 7.8 Hz, 2H, ArH), 6.02 (s, 1H, CH), 5.85 (d, *J* = 14.2 Hz, 1H, CH), 5.80 (d, *J* = 14.1 Hz, 1H, CH), 2.29 (s, 3H, CH<sub>3</sub>), 1.35 (s, 6H, CH<sub>3</sub>); <sup>13</sup>C NMR (150 MHz, DMSO-*d*<sub>6</sub>)  $\delta$ (ppm): 164.6, 146.3, 143.4, 141.5, 138.5, 136.4, 136.2, 135.1, 131.4, 130.8, 130.7, 130.5, 129.5, 128.5, 127.8, 127.1, 124.4, 90.4, 75.3, 63.1, 40.8, 25.9, 20.7; MS (*m/z*): 498.28 ([M-H]<sup>-</sup>, 100%); HRMS (ESI) Calcd. for C<sub>30</sub>H<sub>25</sub>ClNO<sub>4</sub> ([M-H]<sup>-</sup>): 498.1472. Found: 498.1456.

### Copies of NMR spectra of products

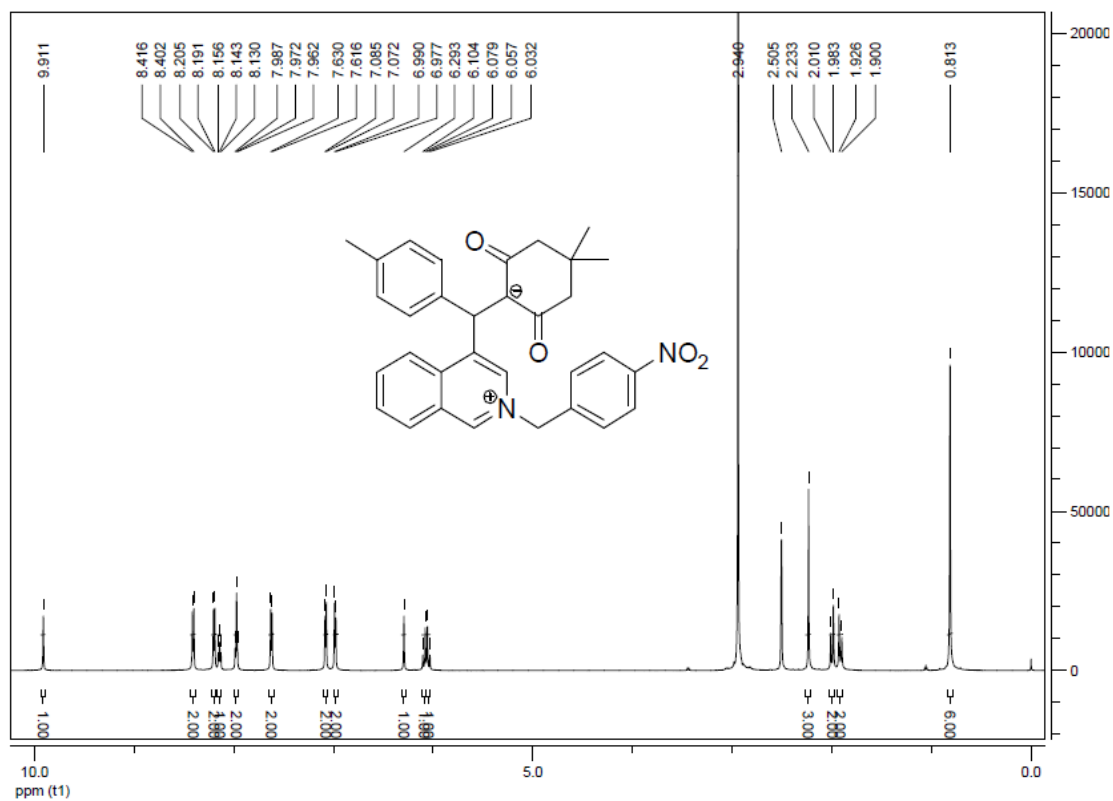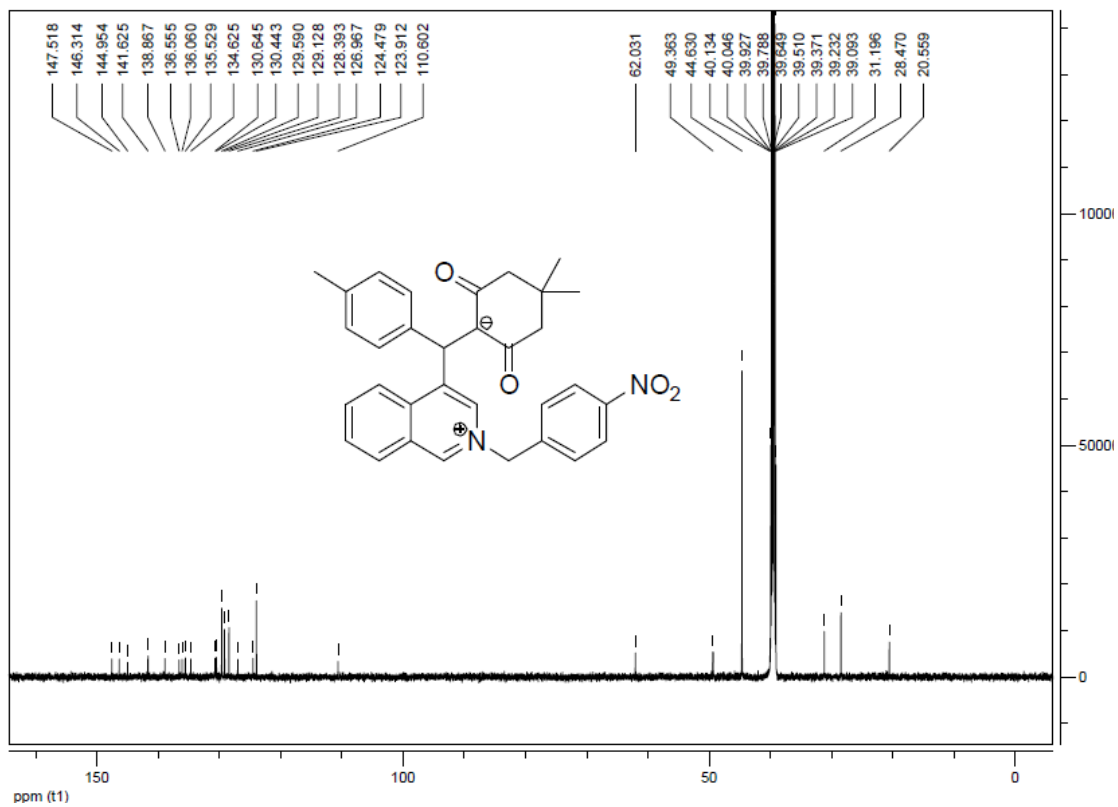

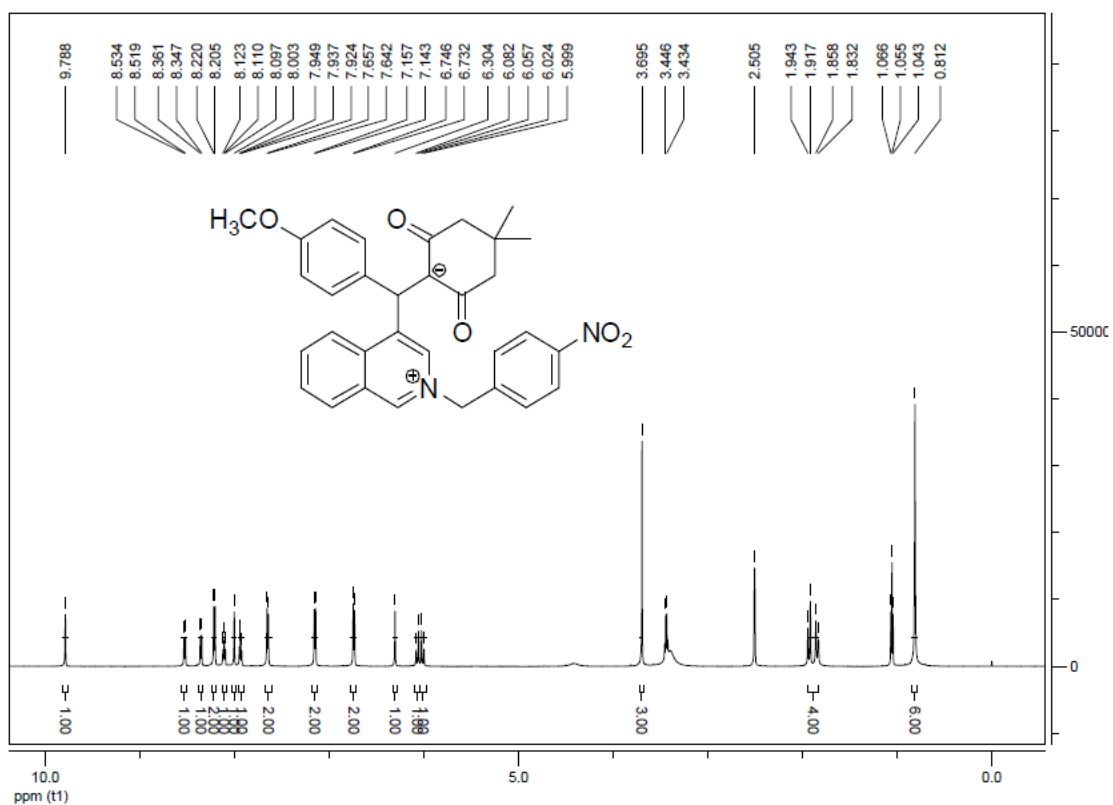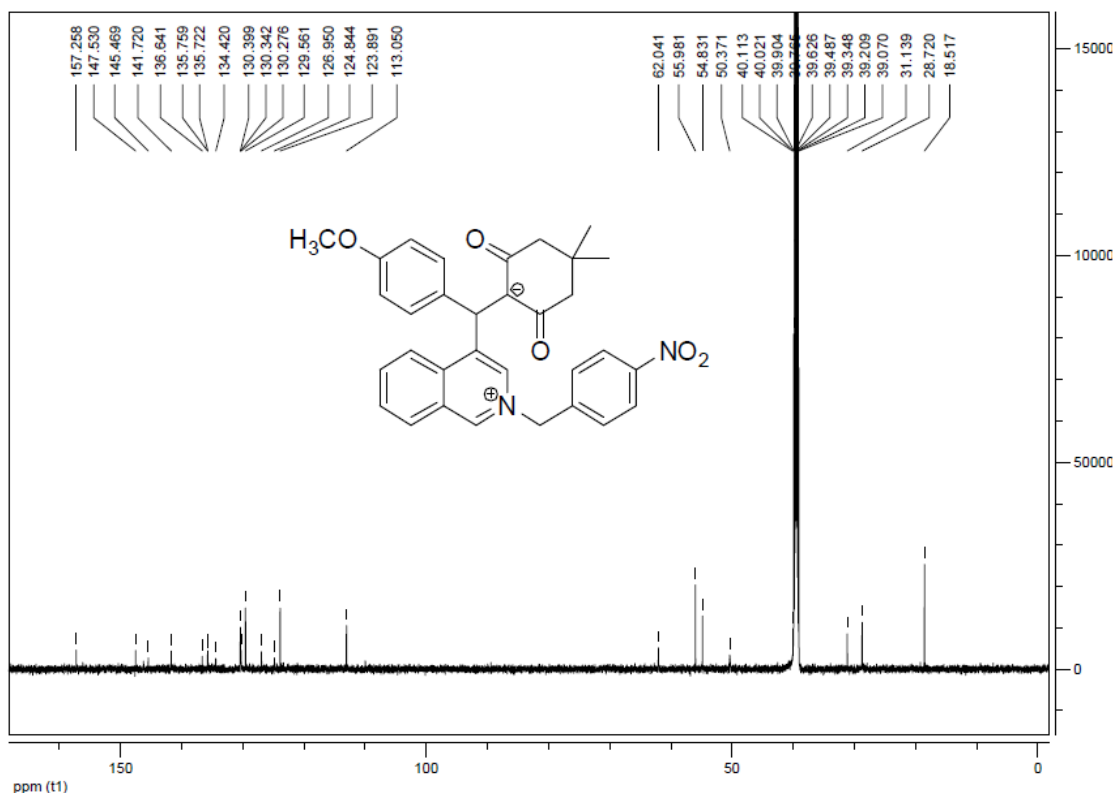



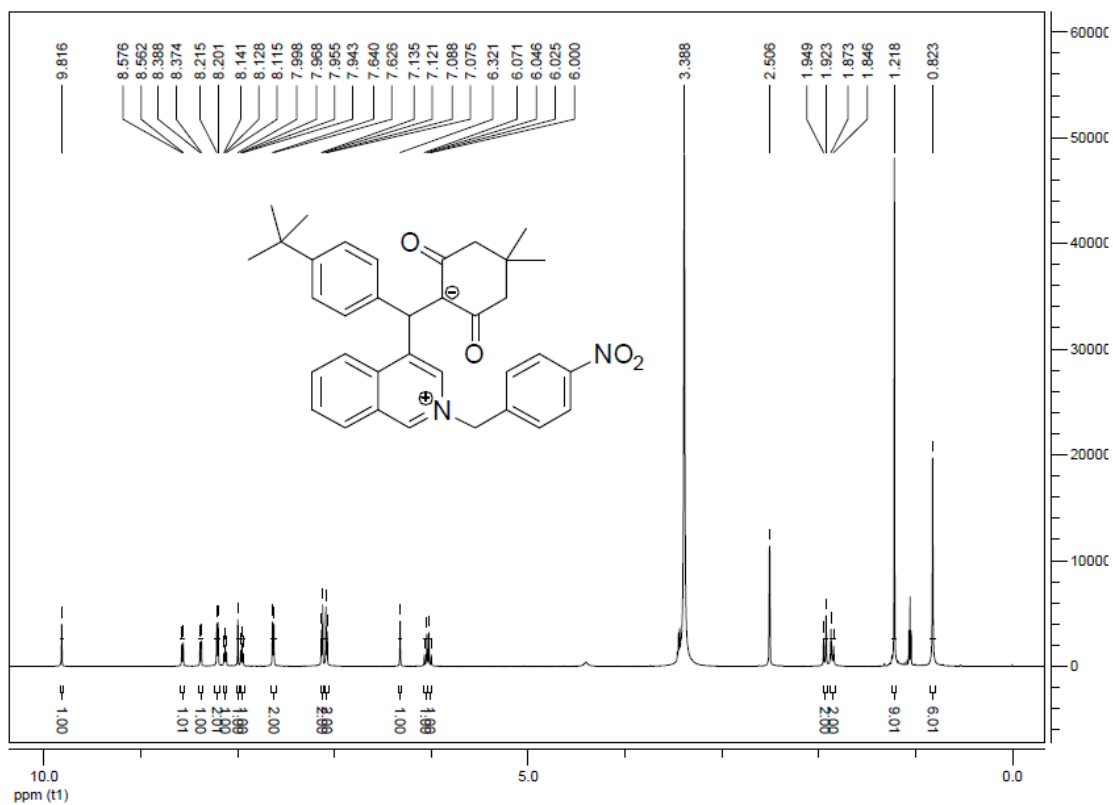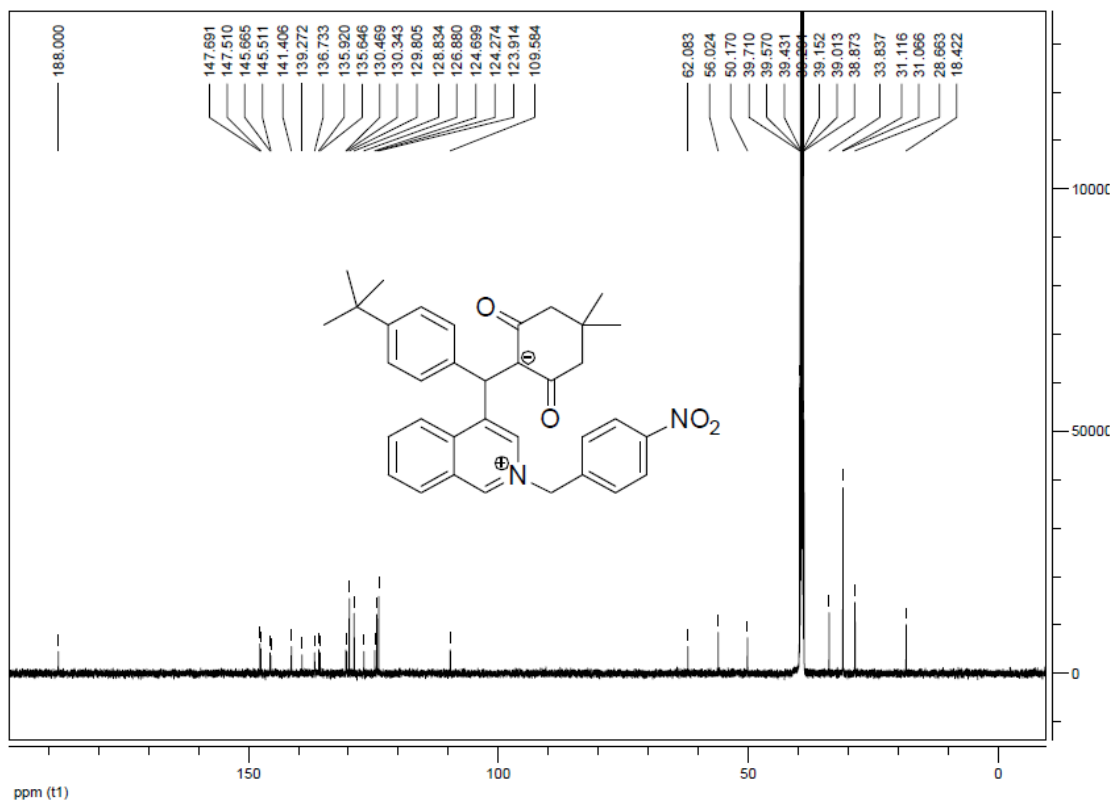



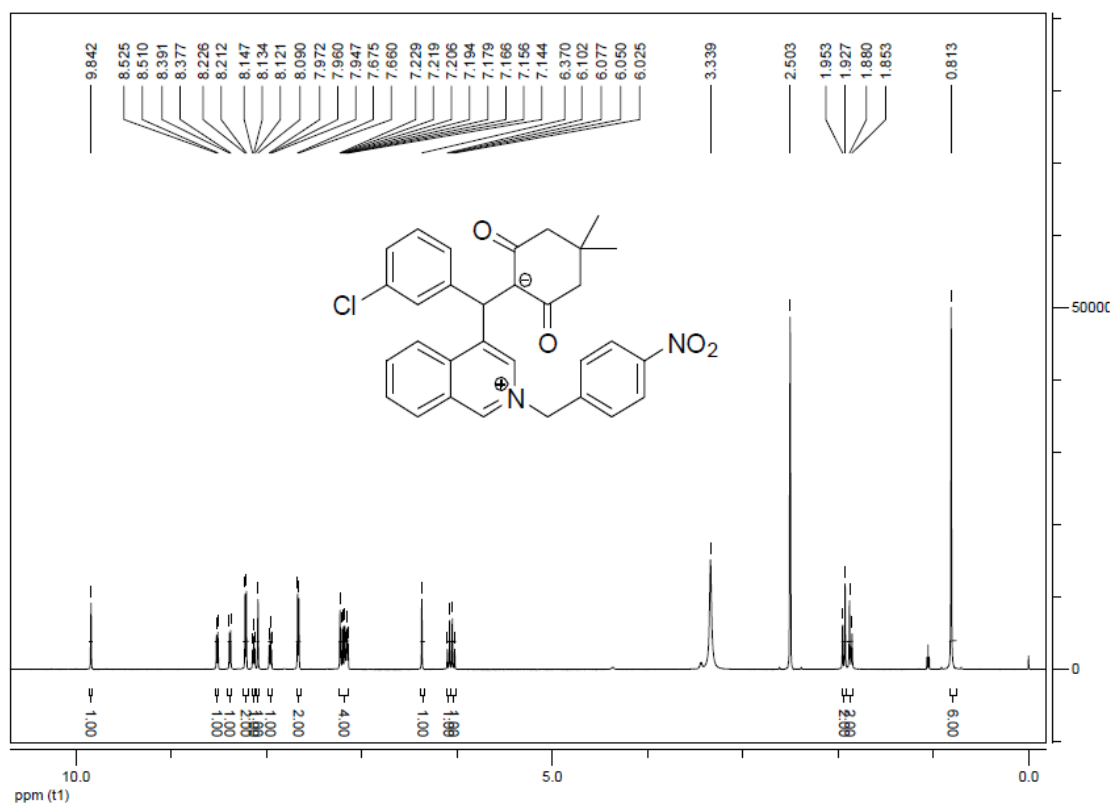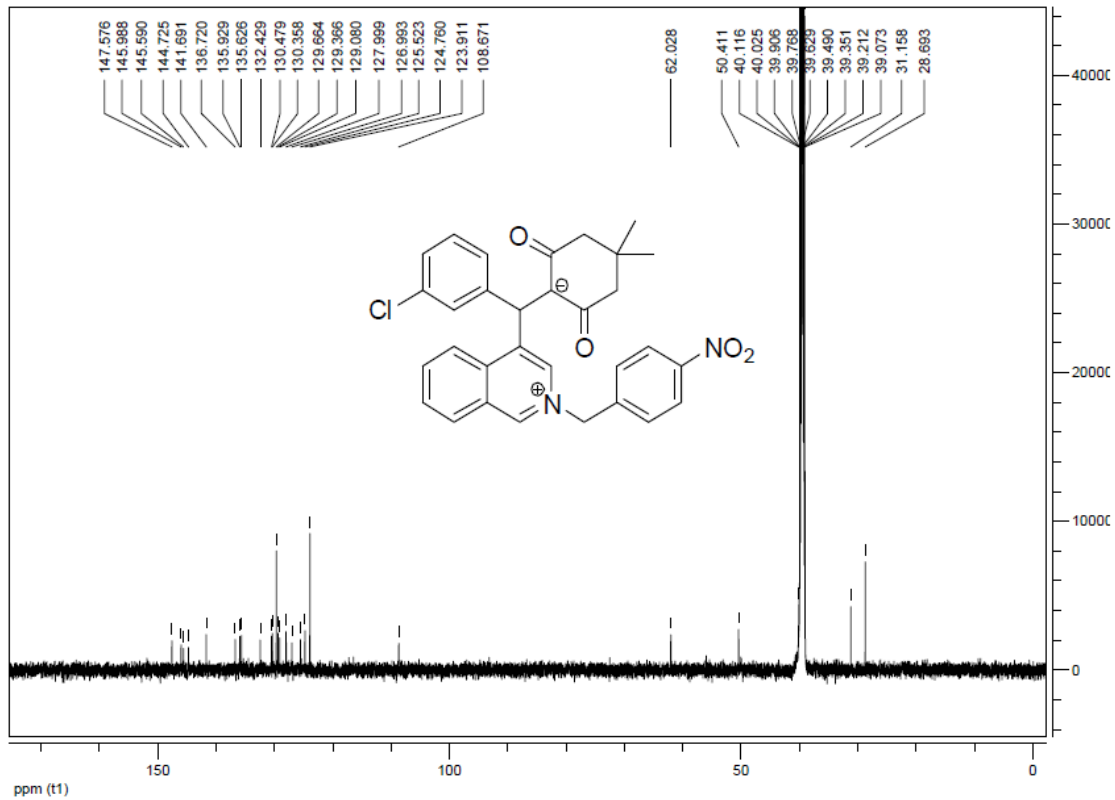

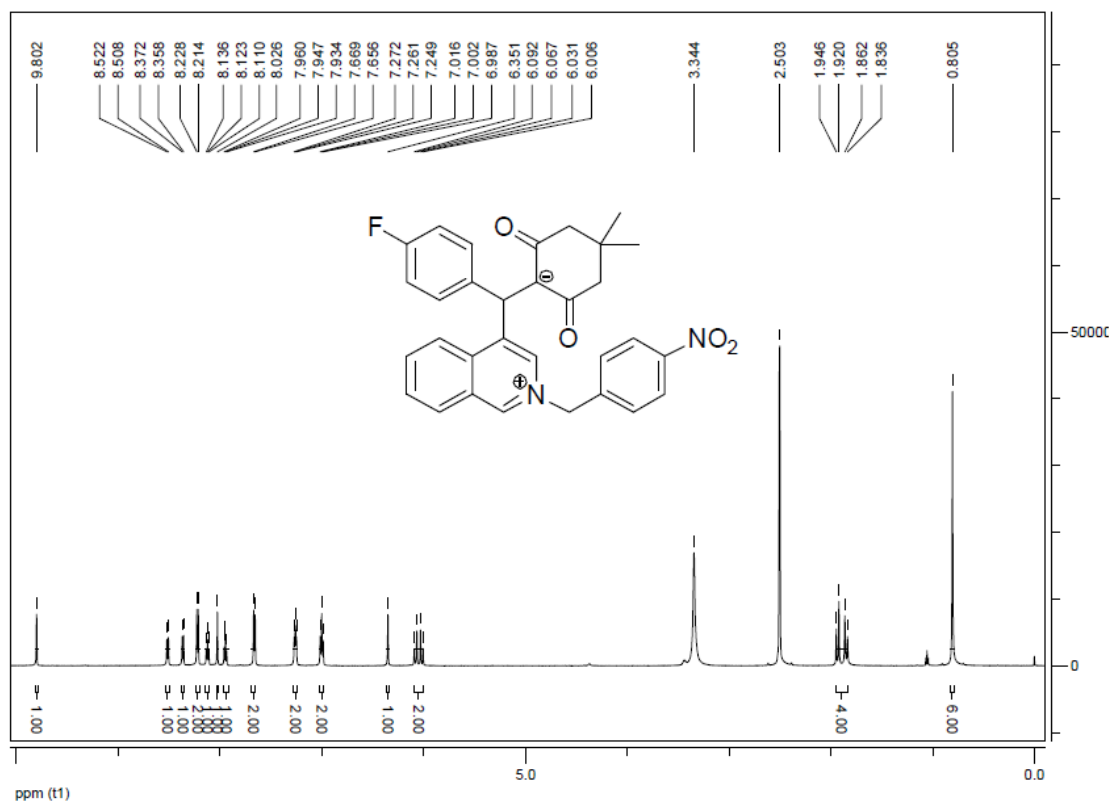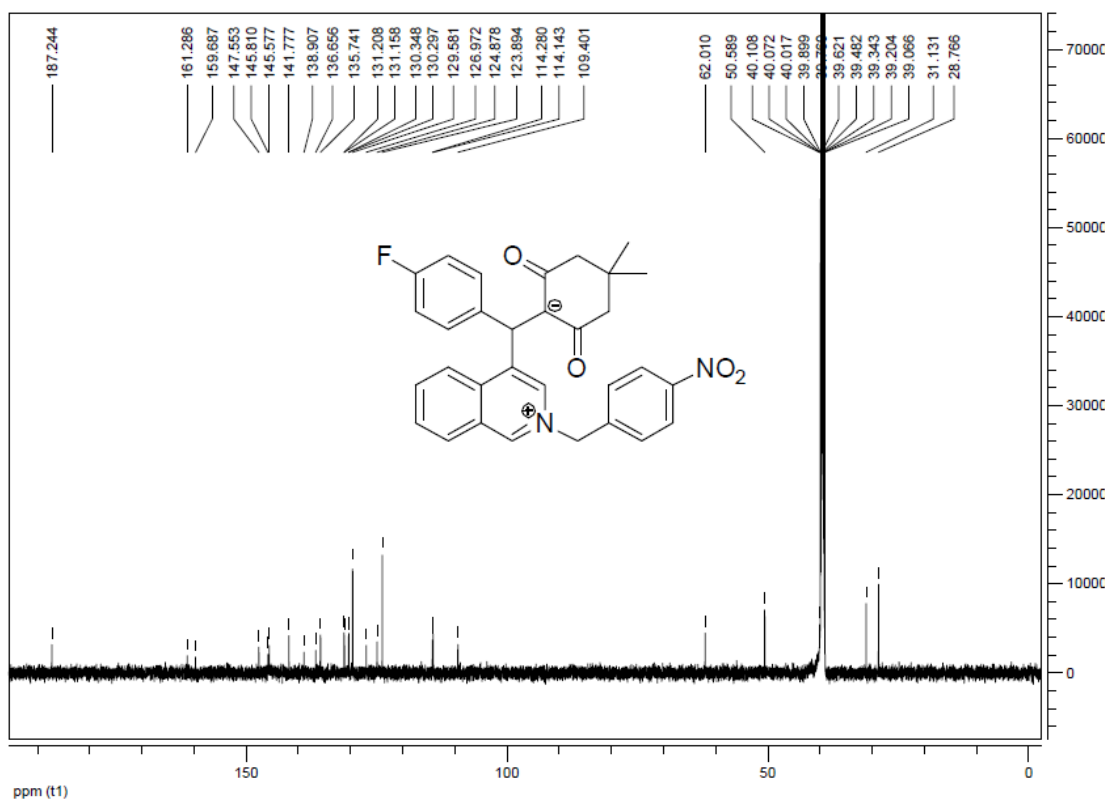

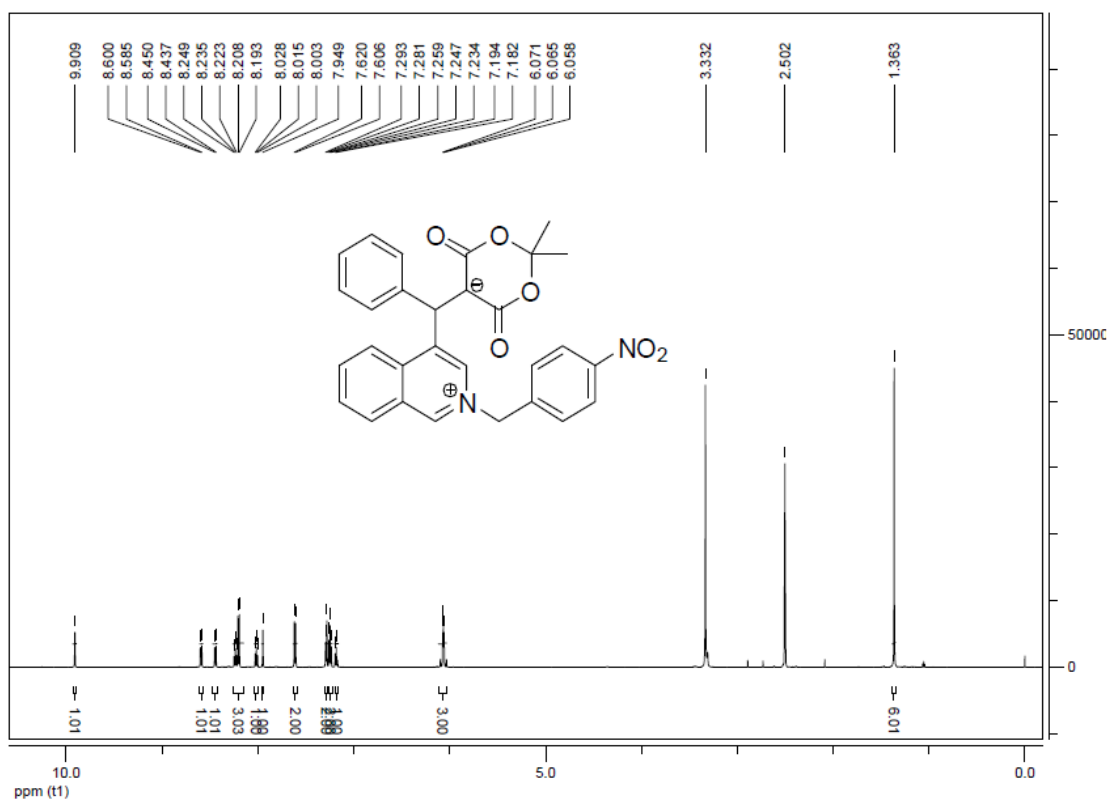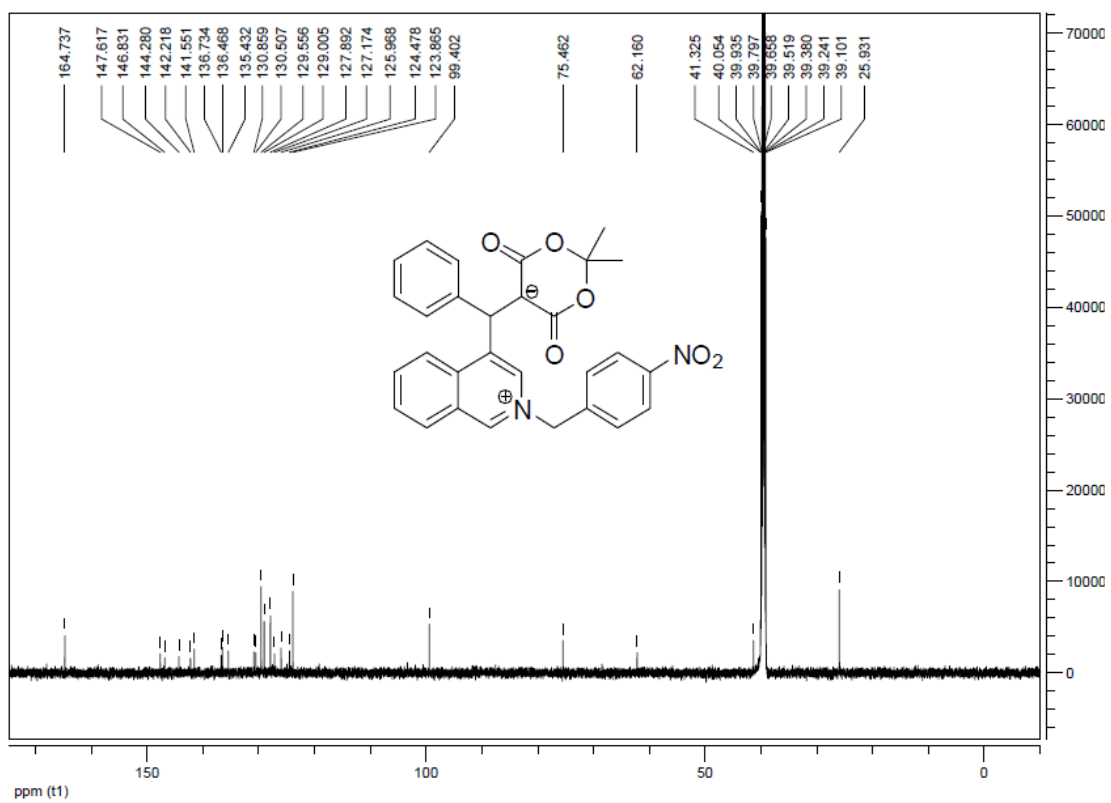



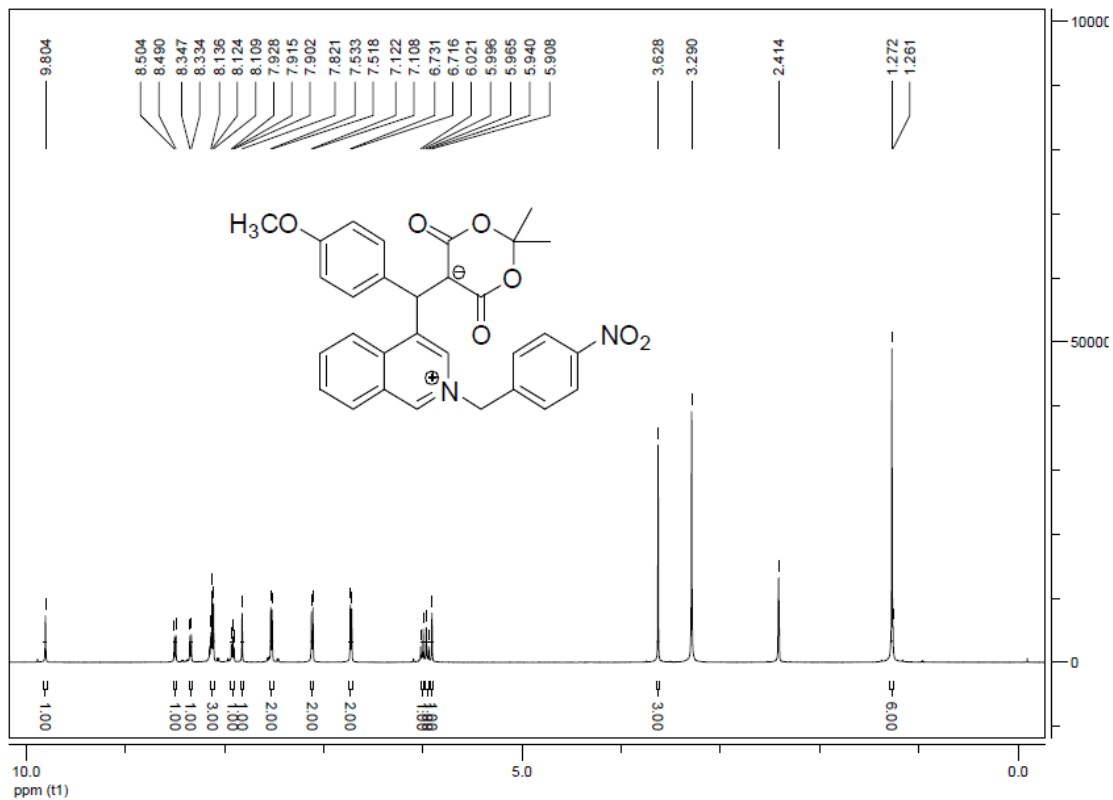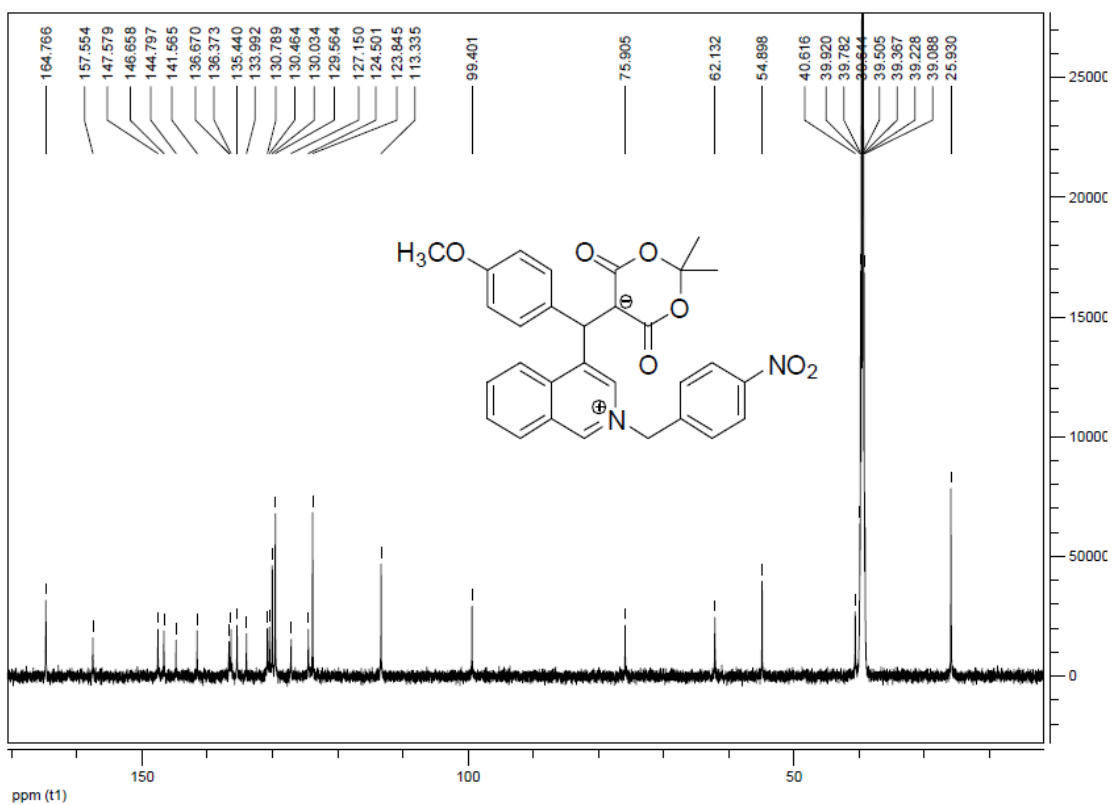

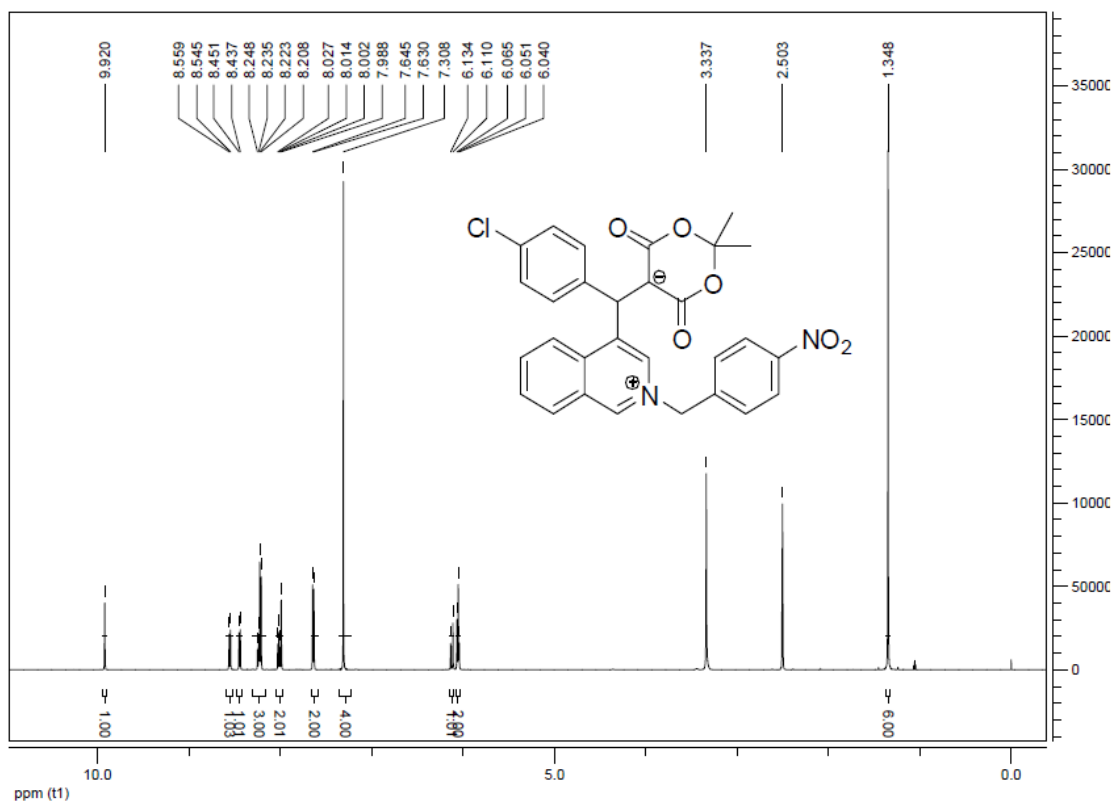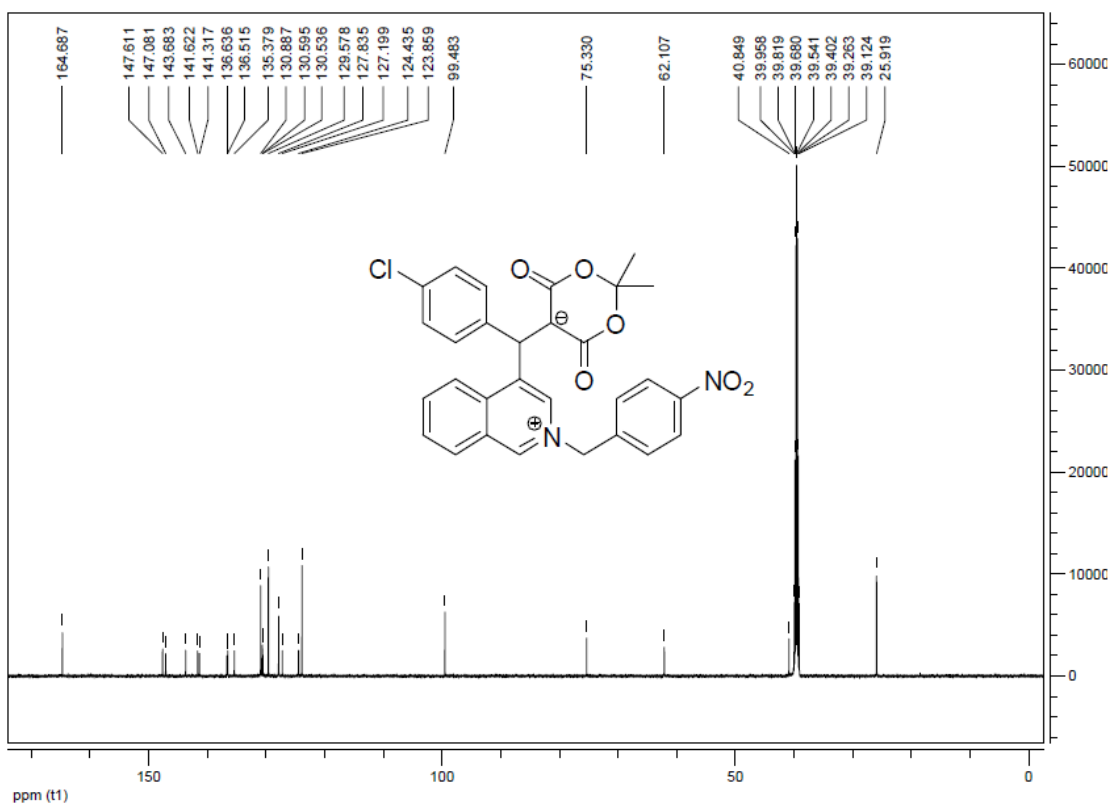



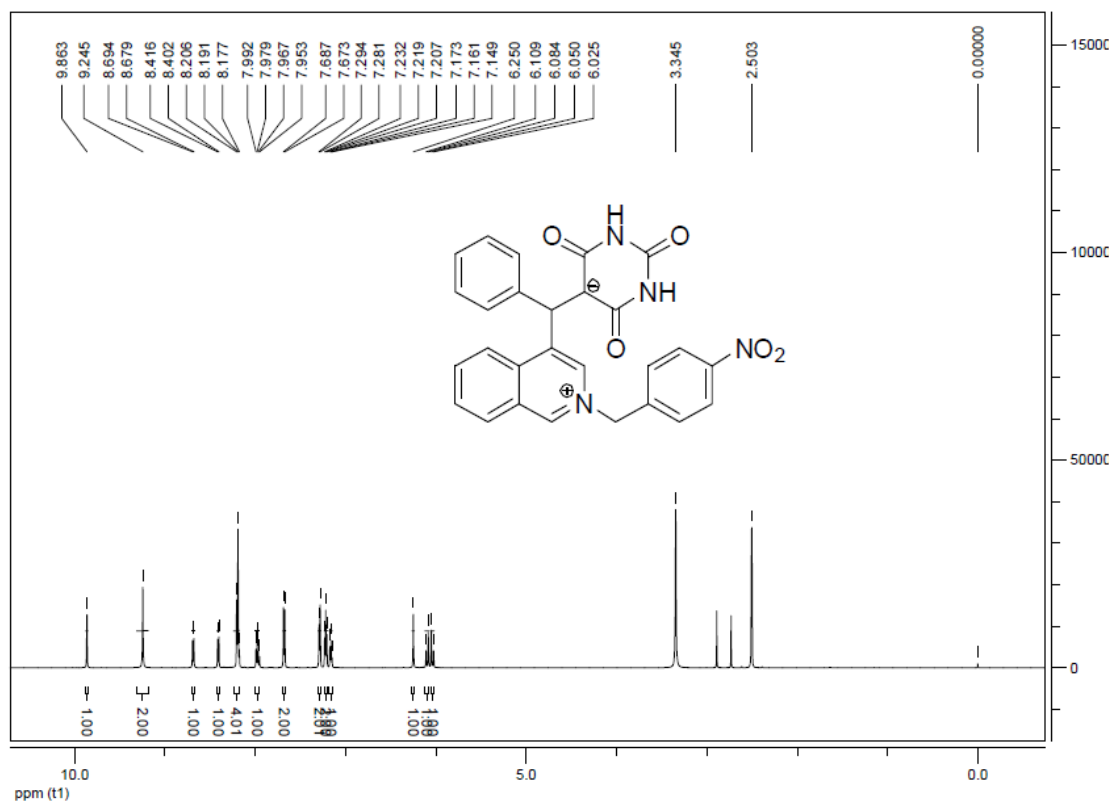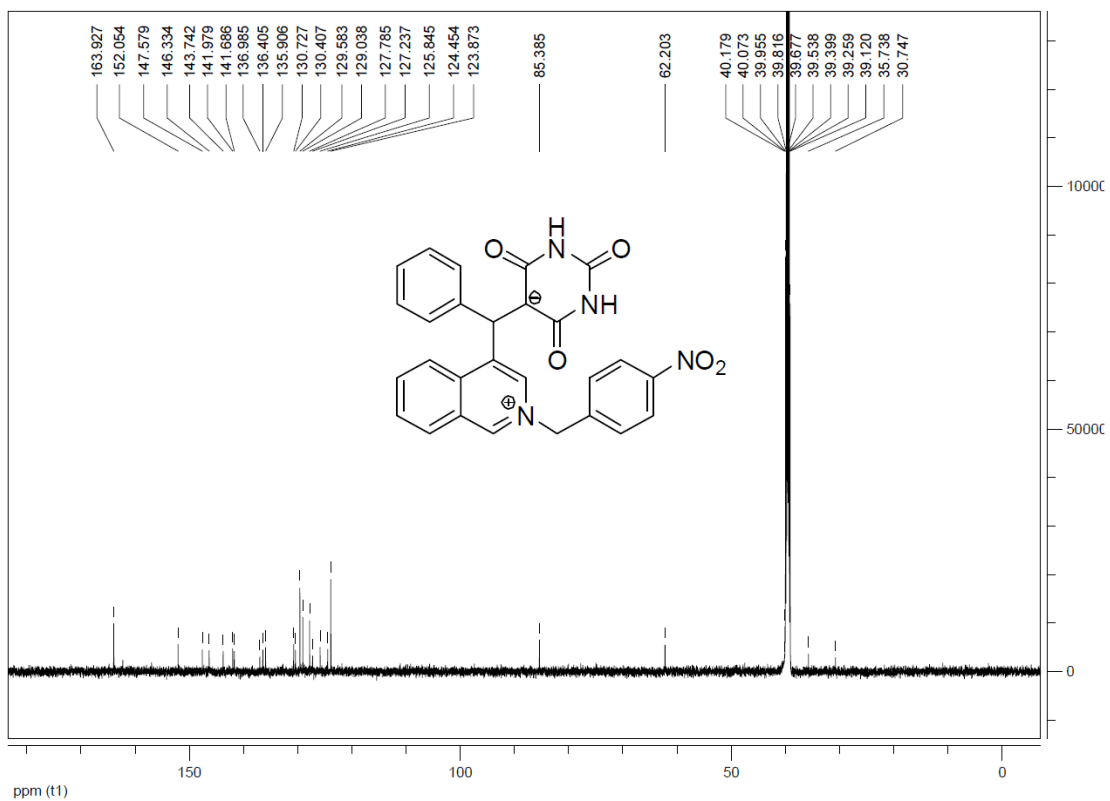



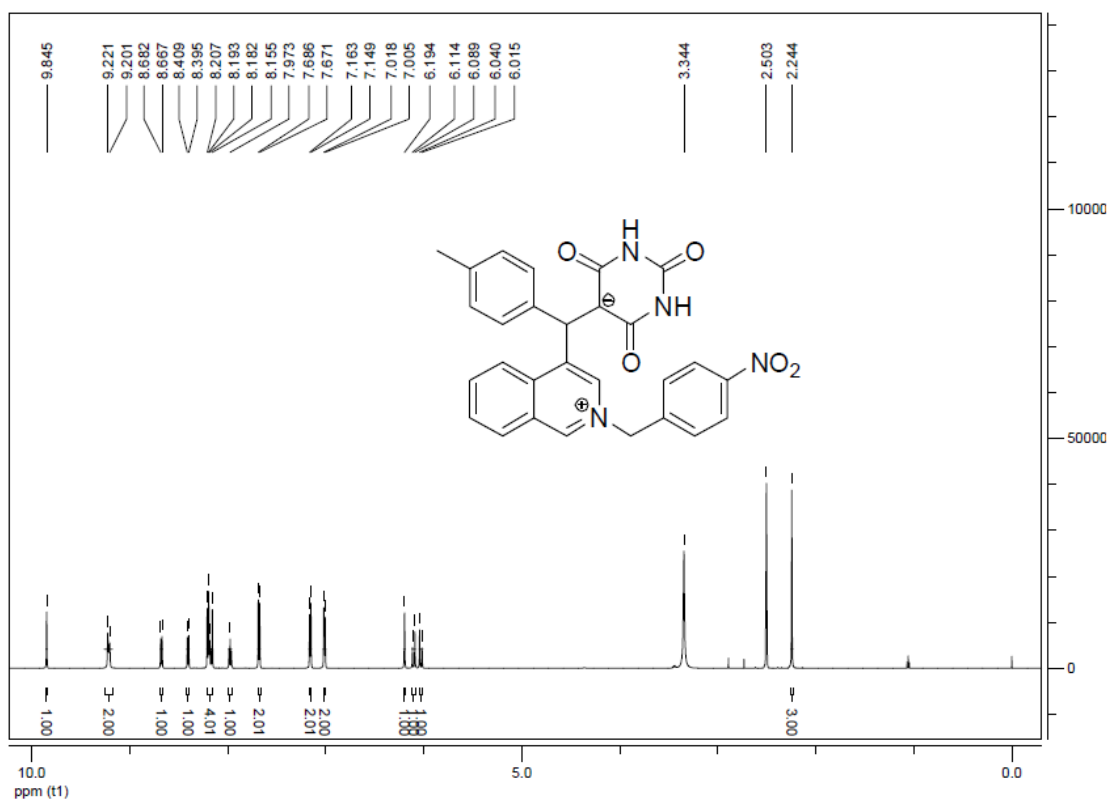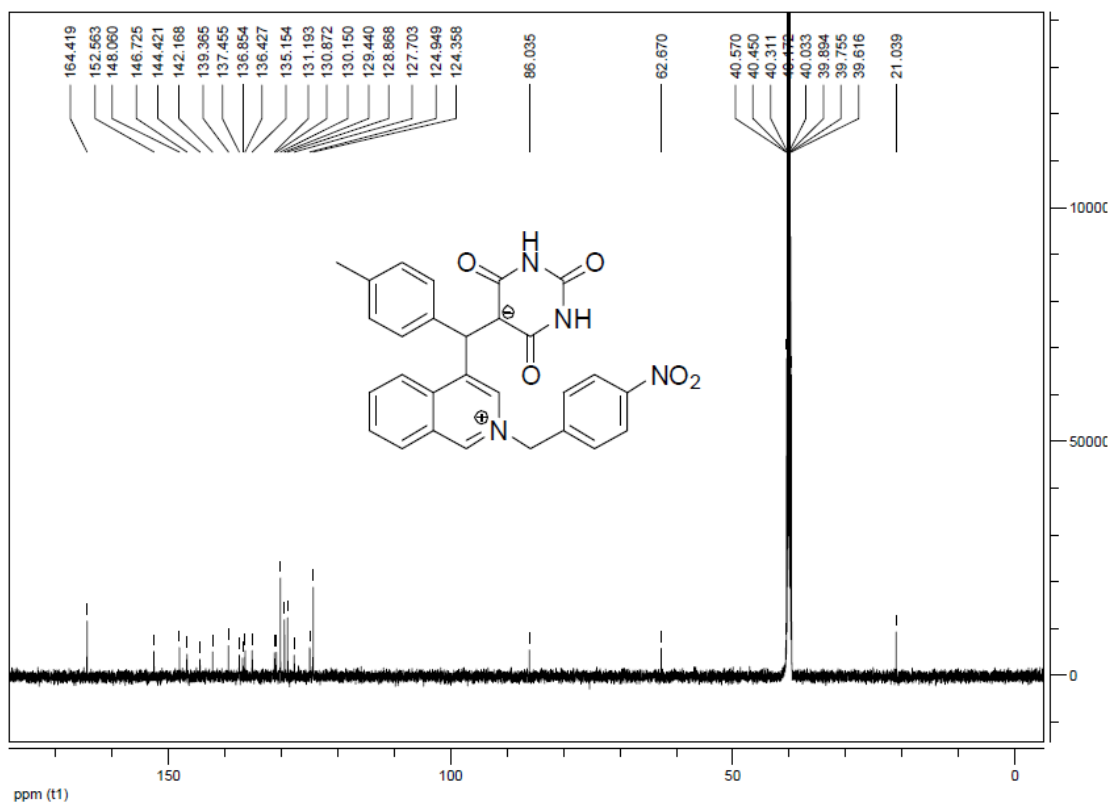

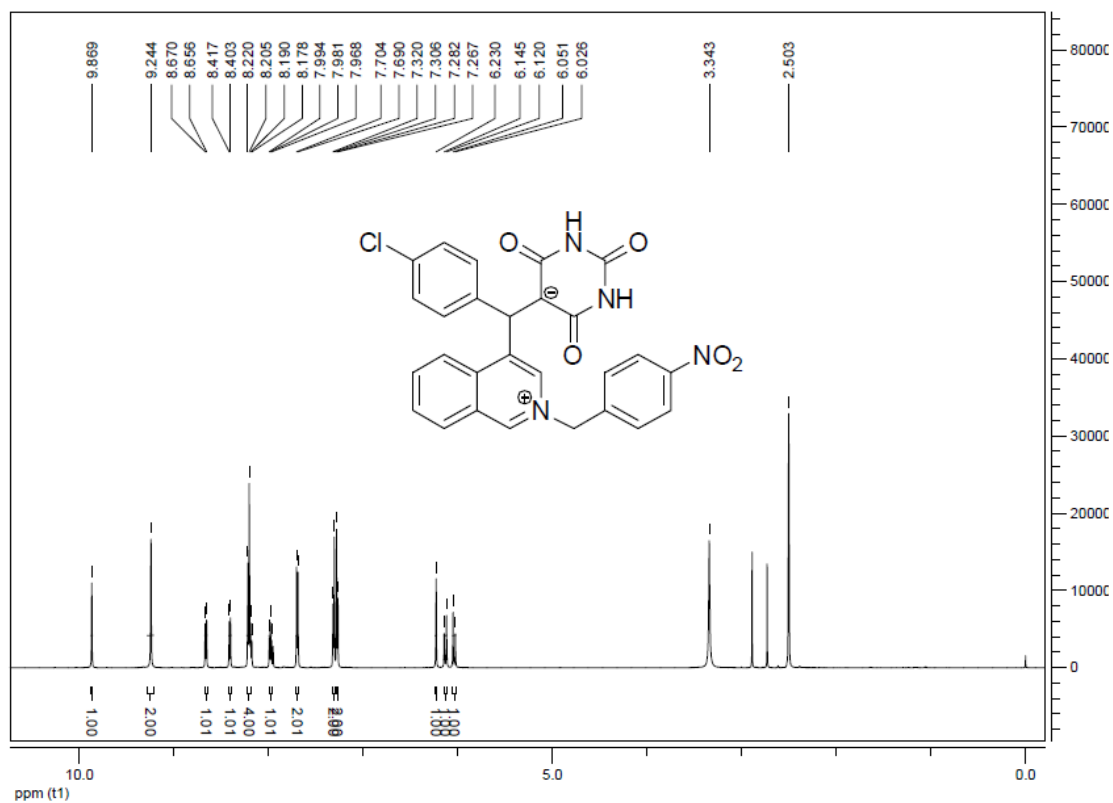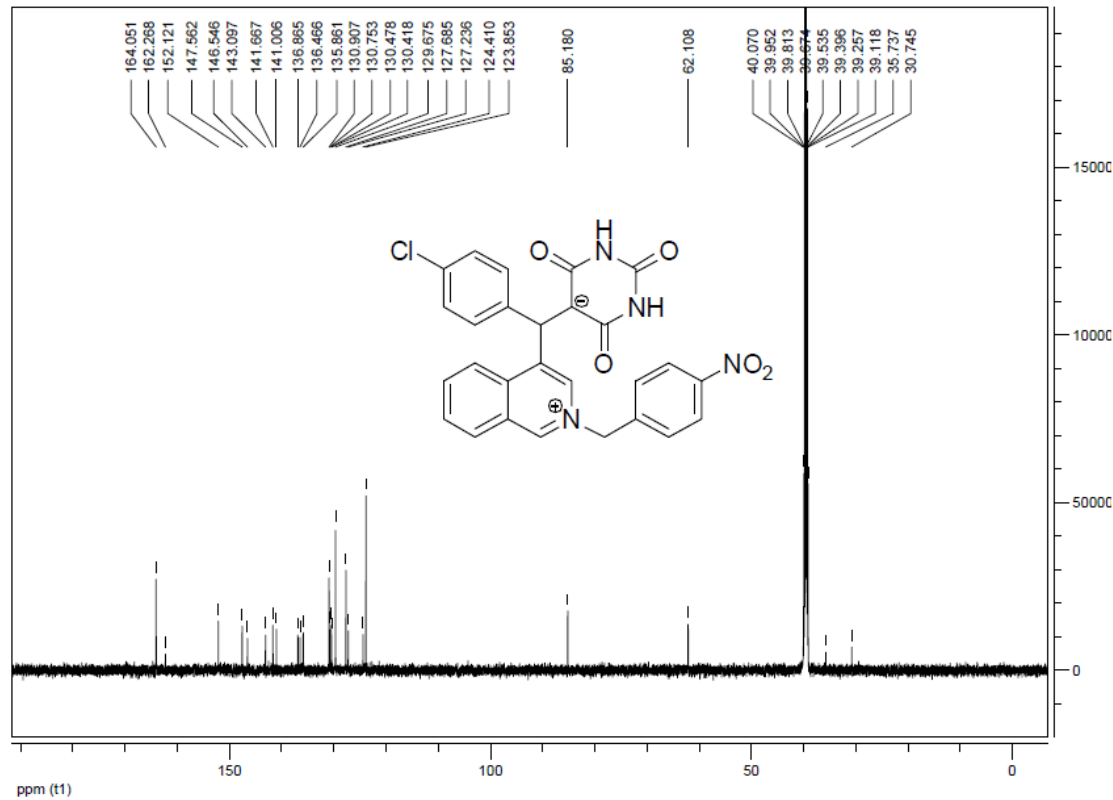

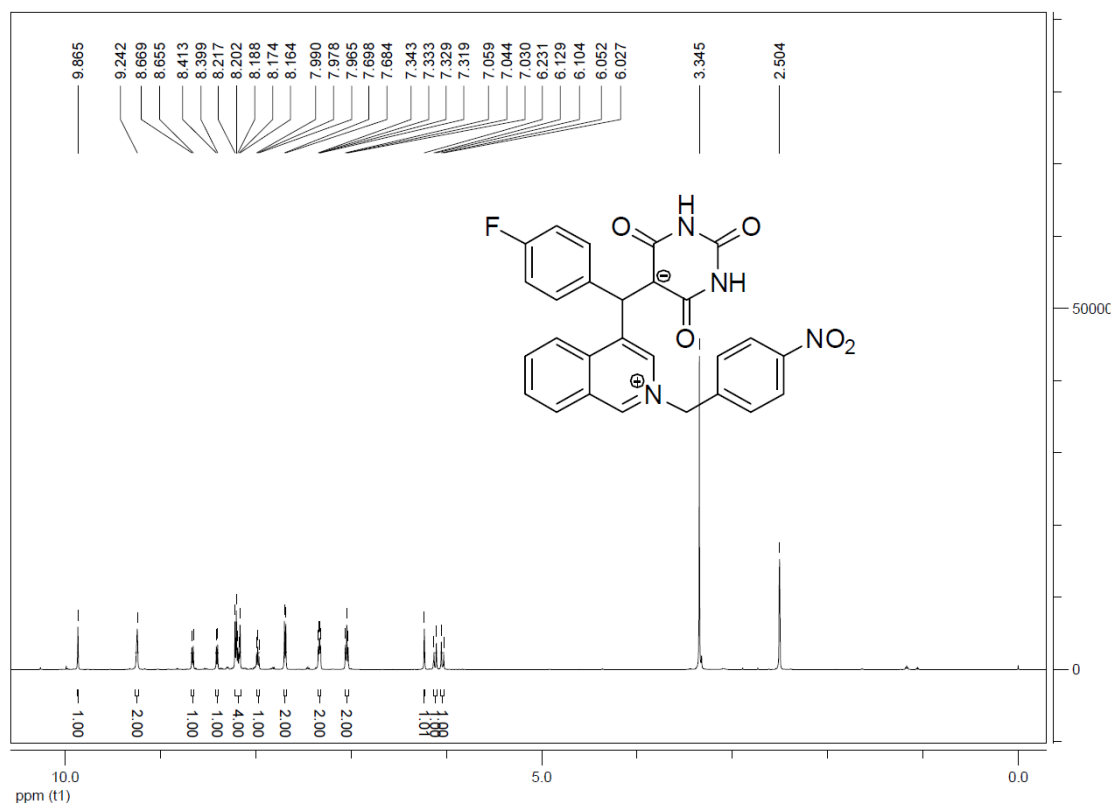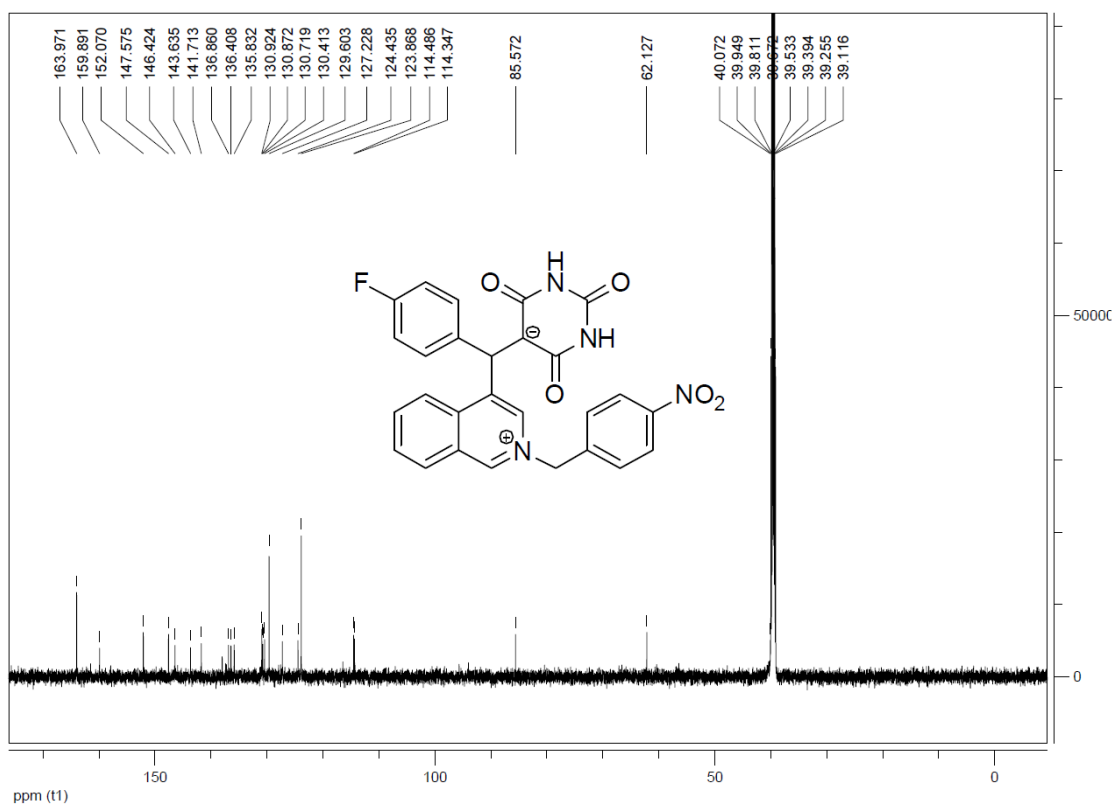



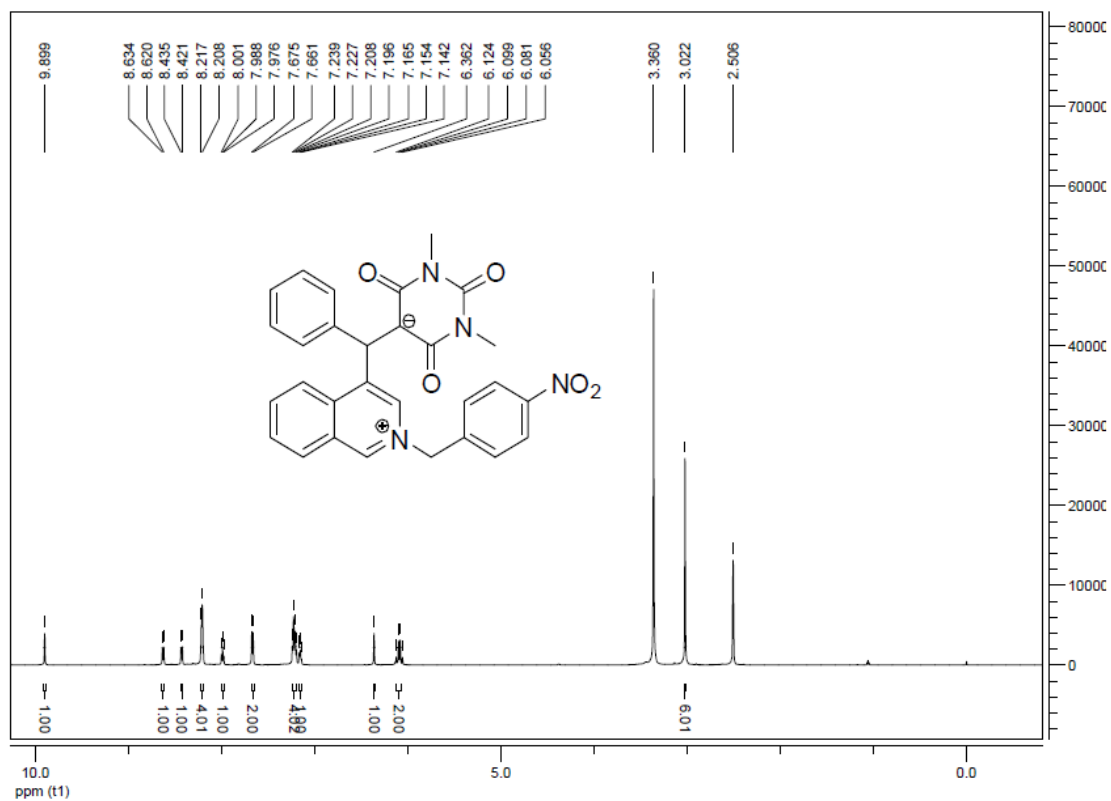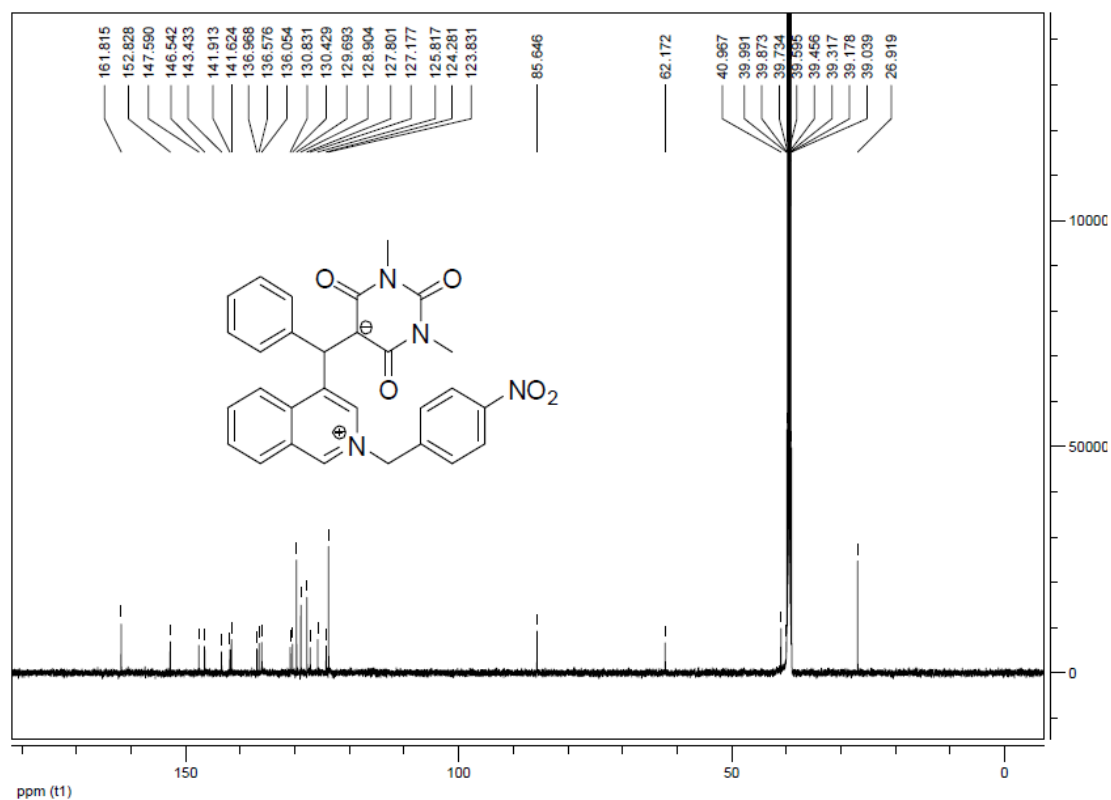

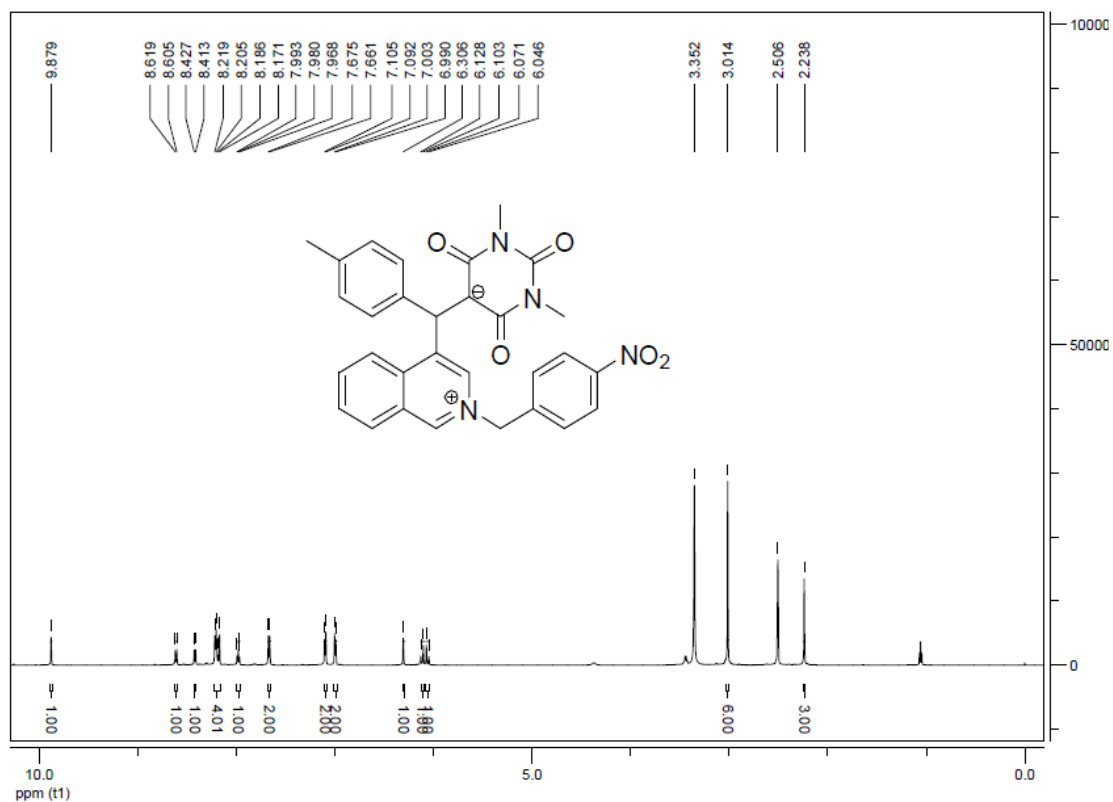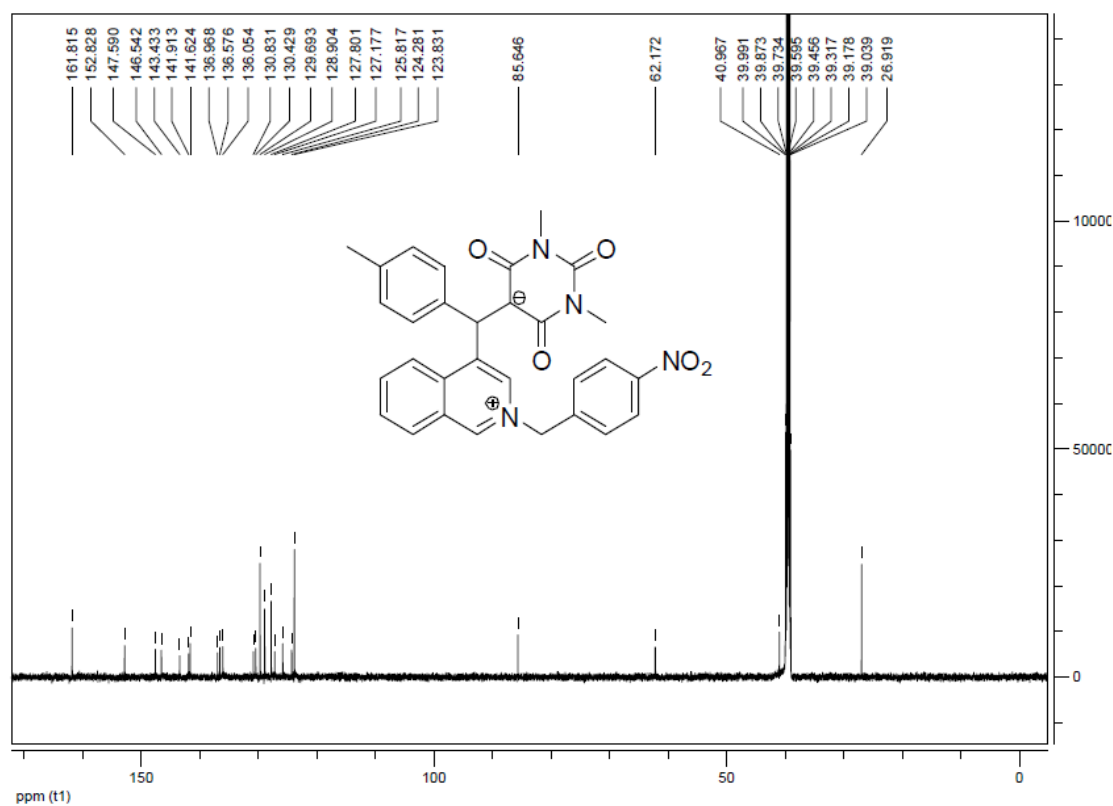

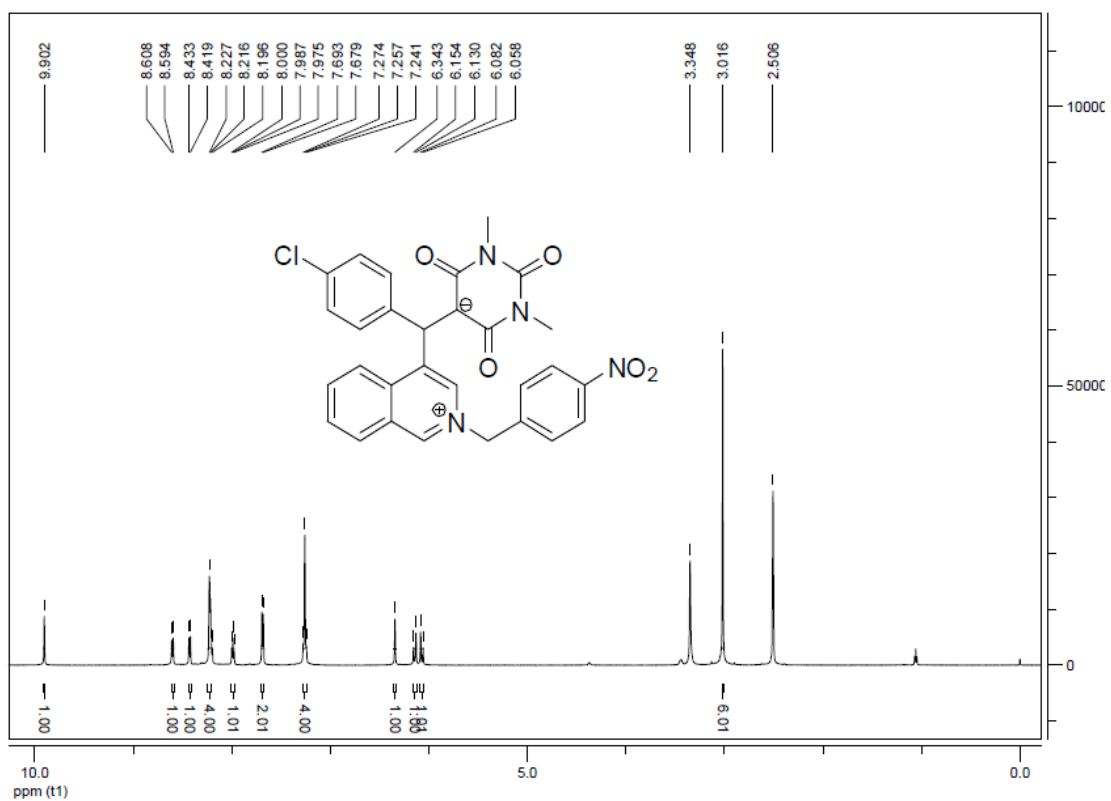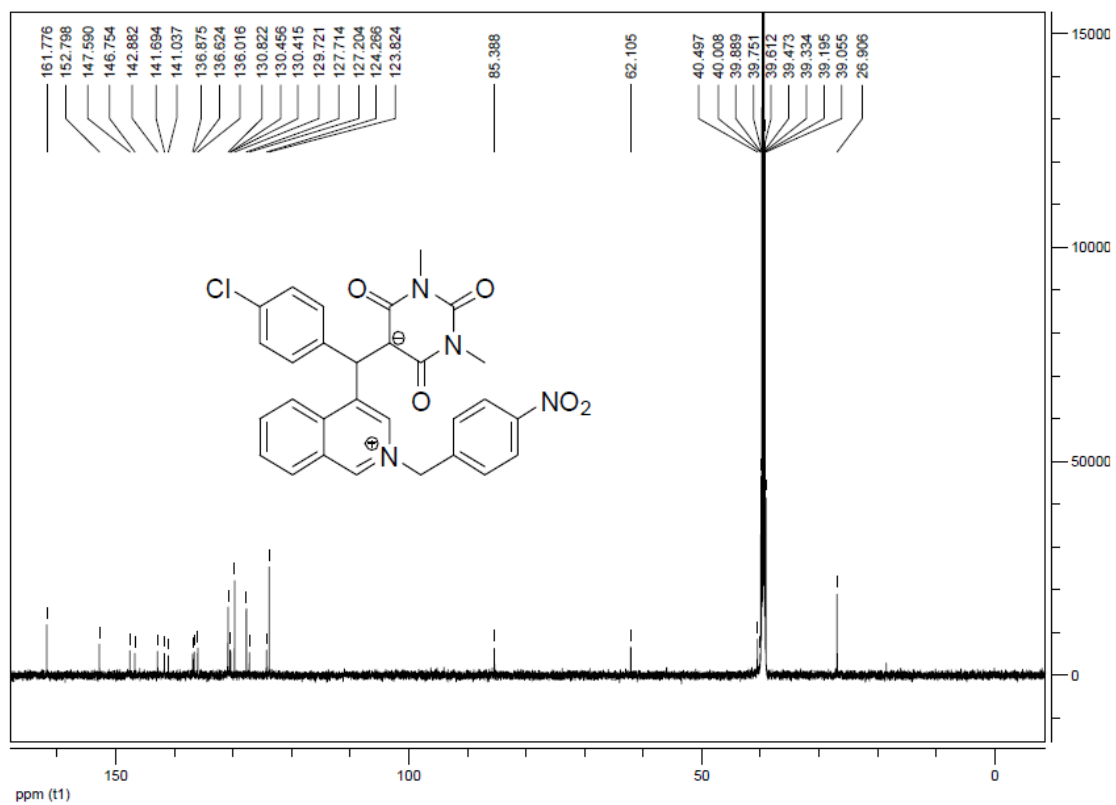

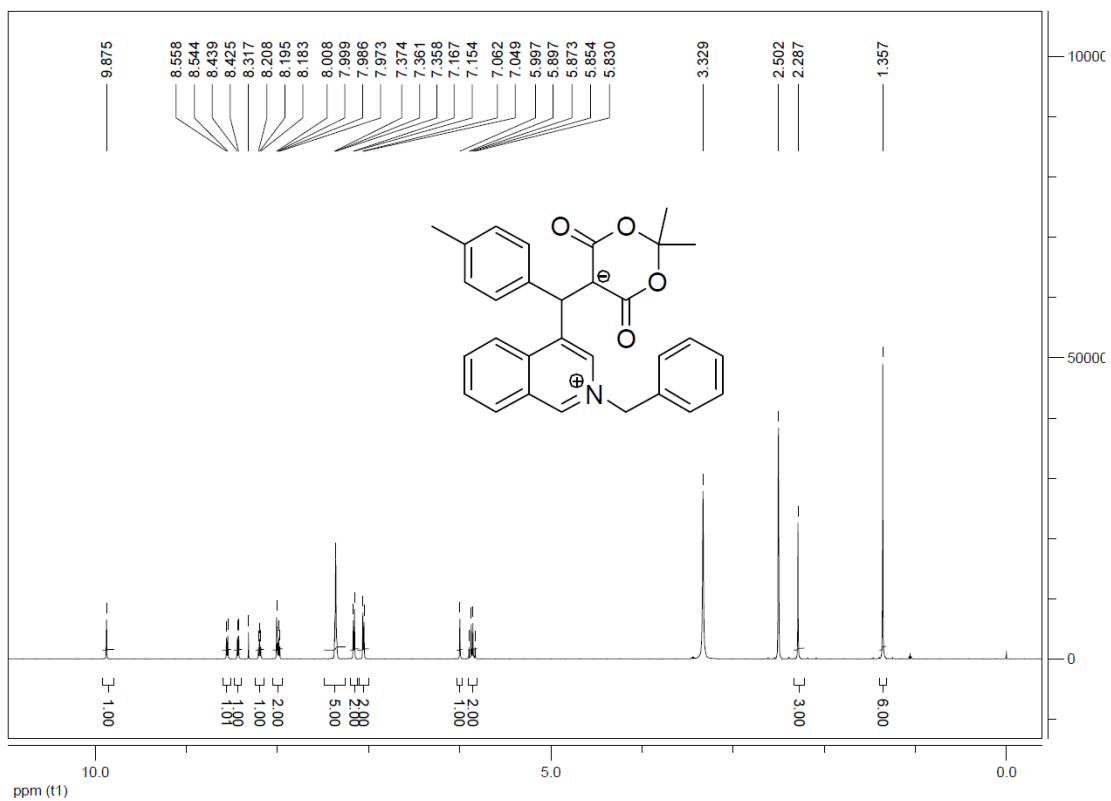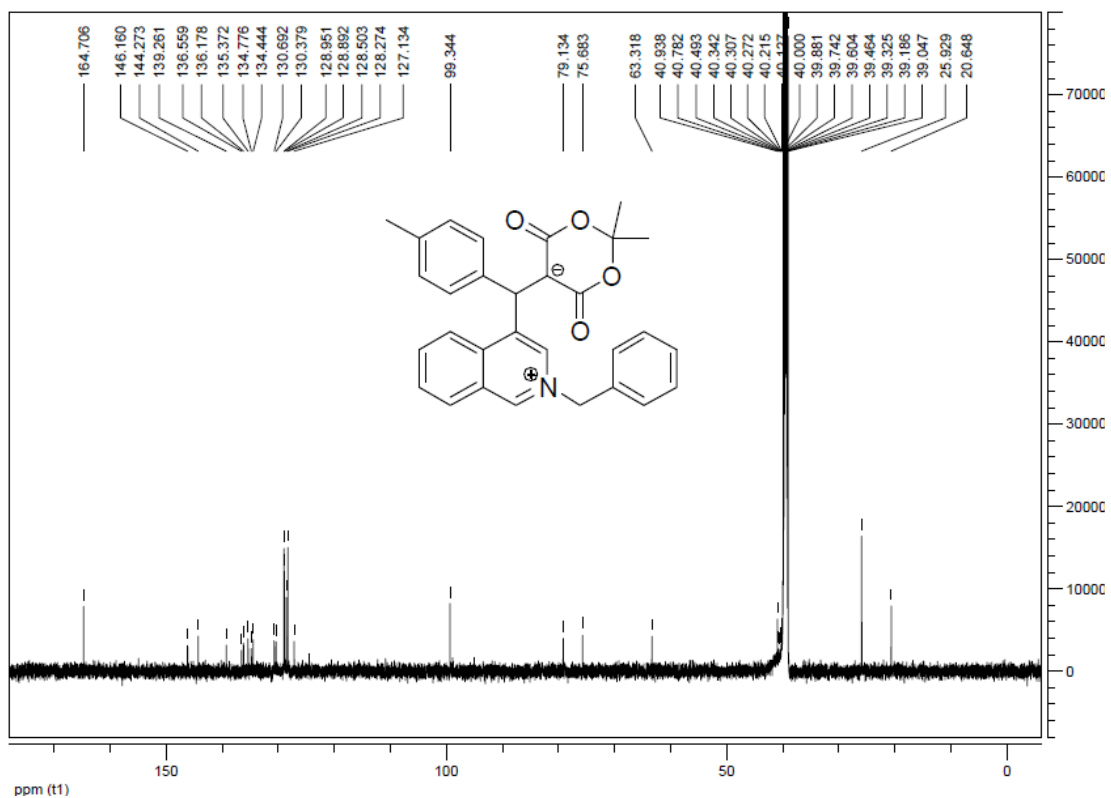



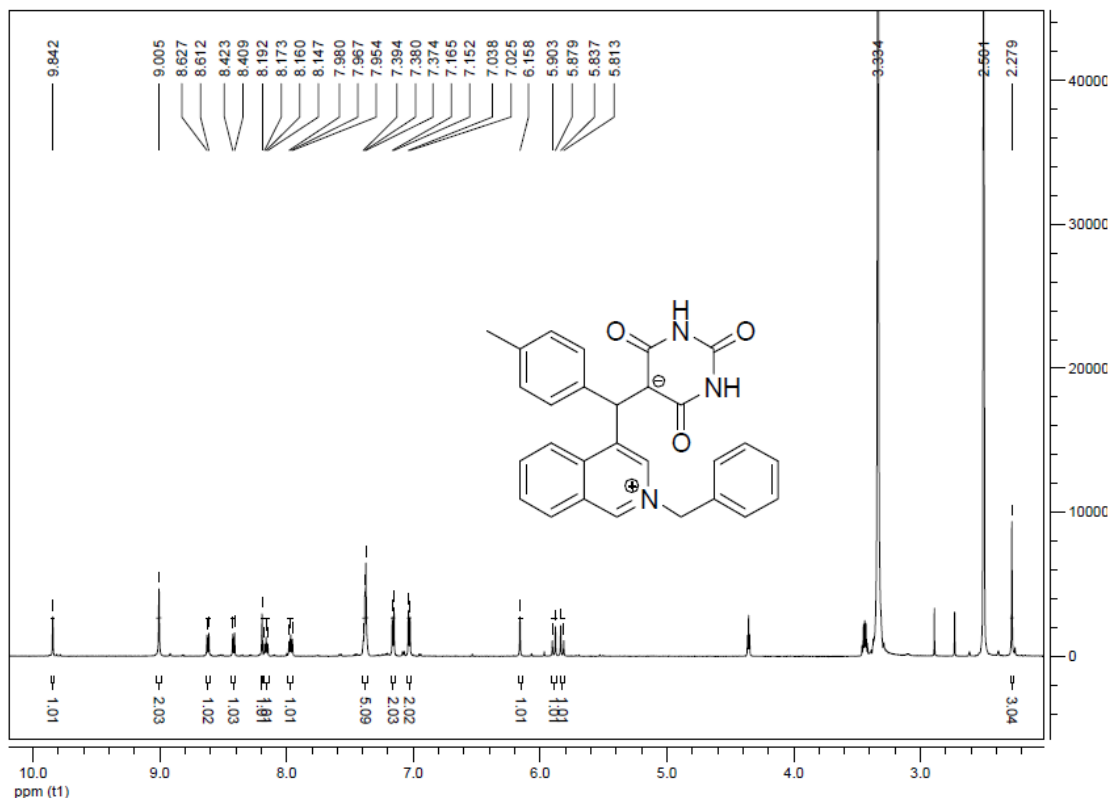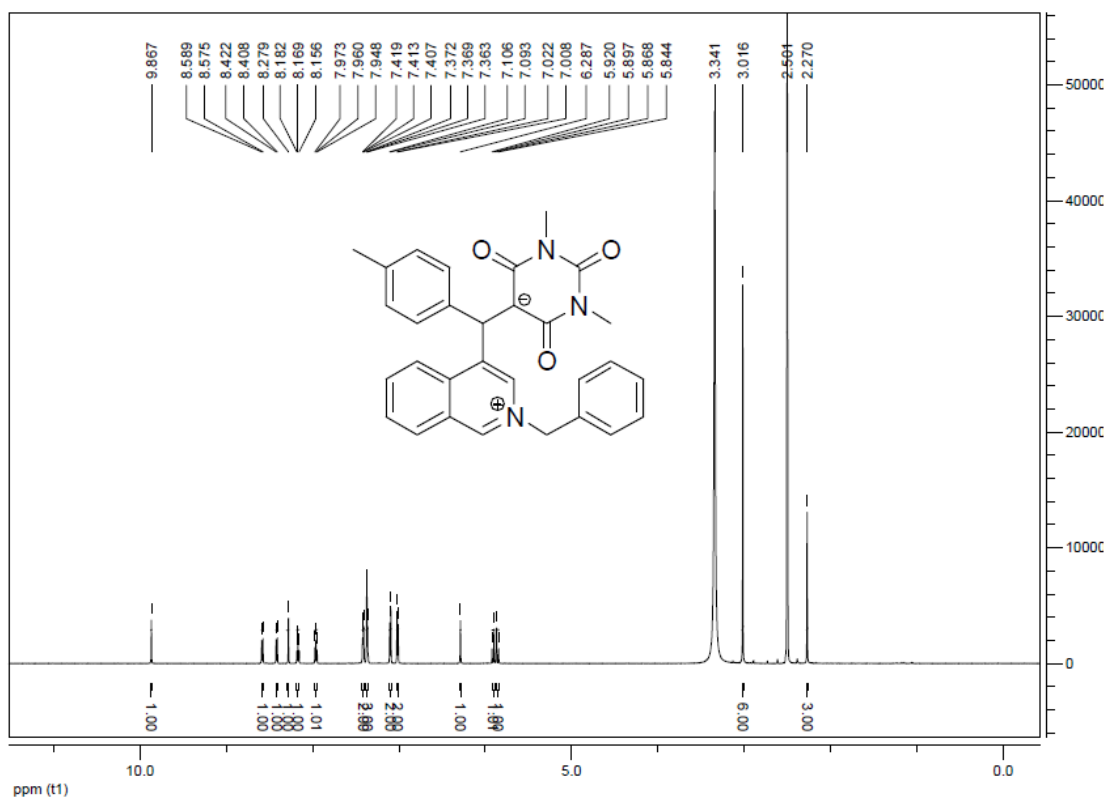

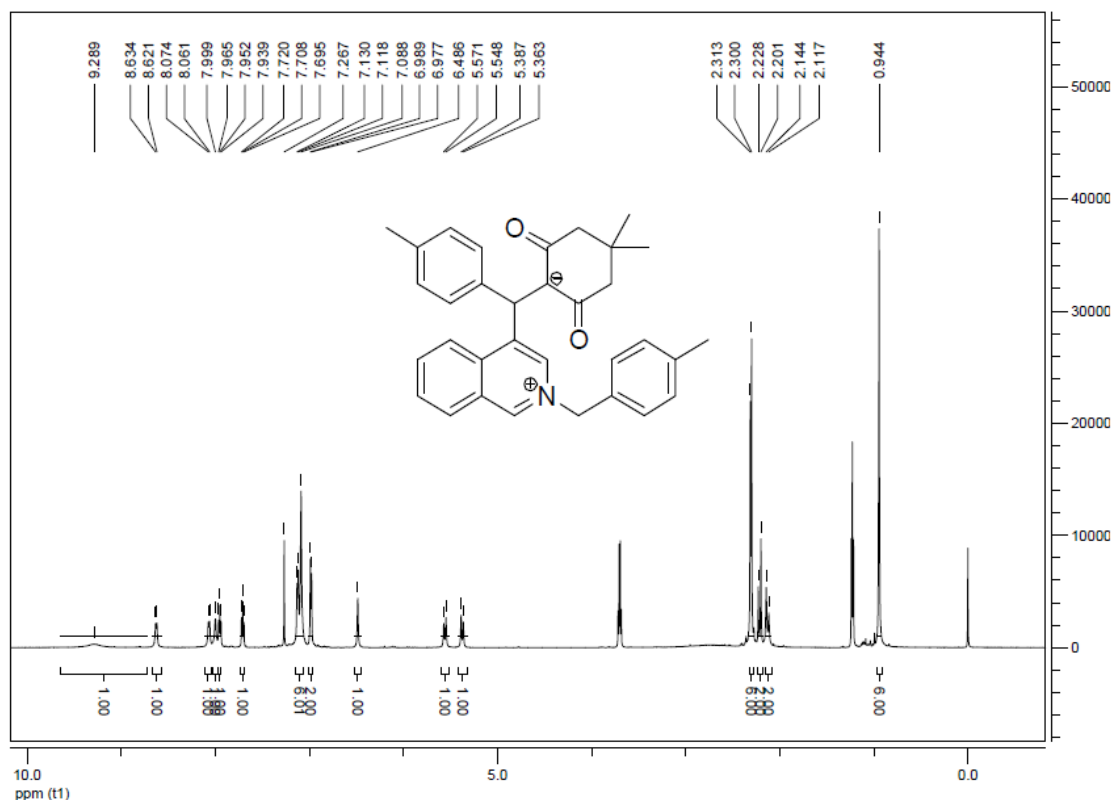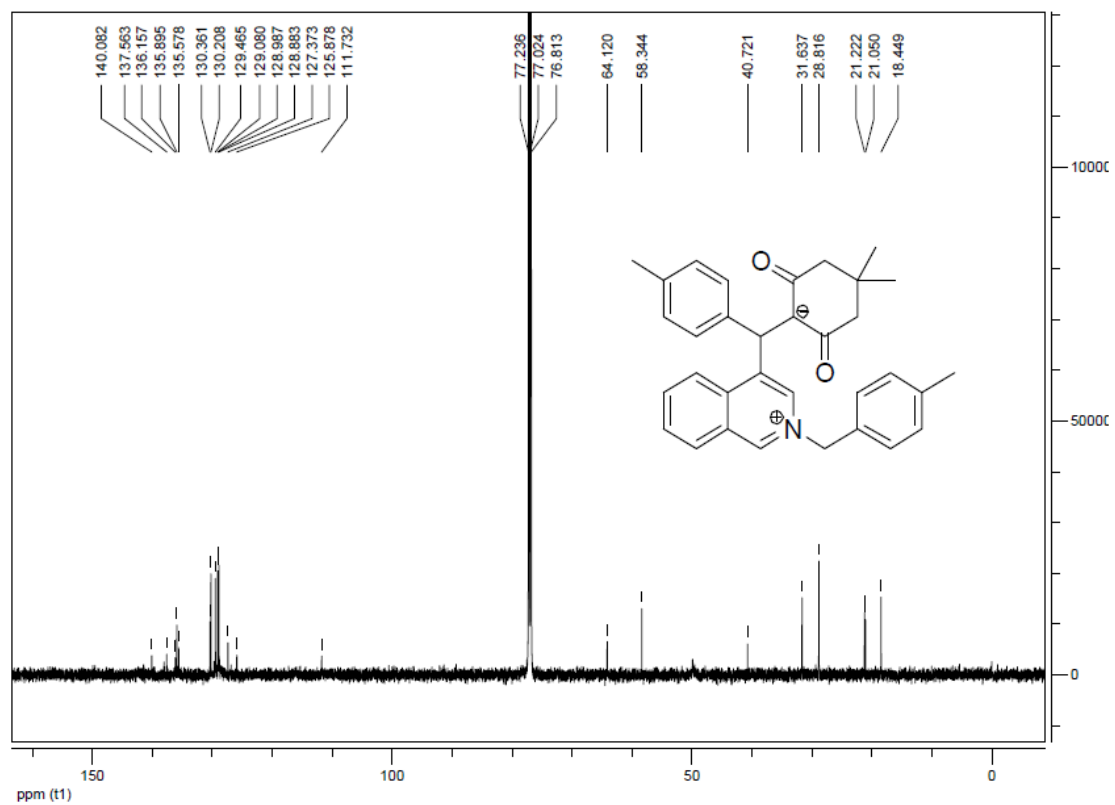

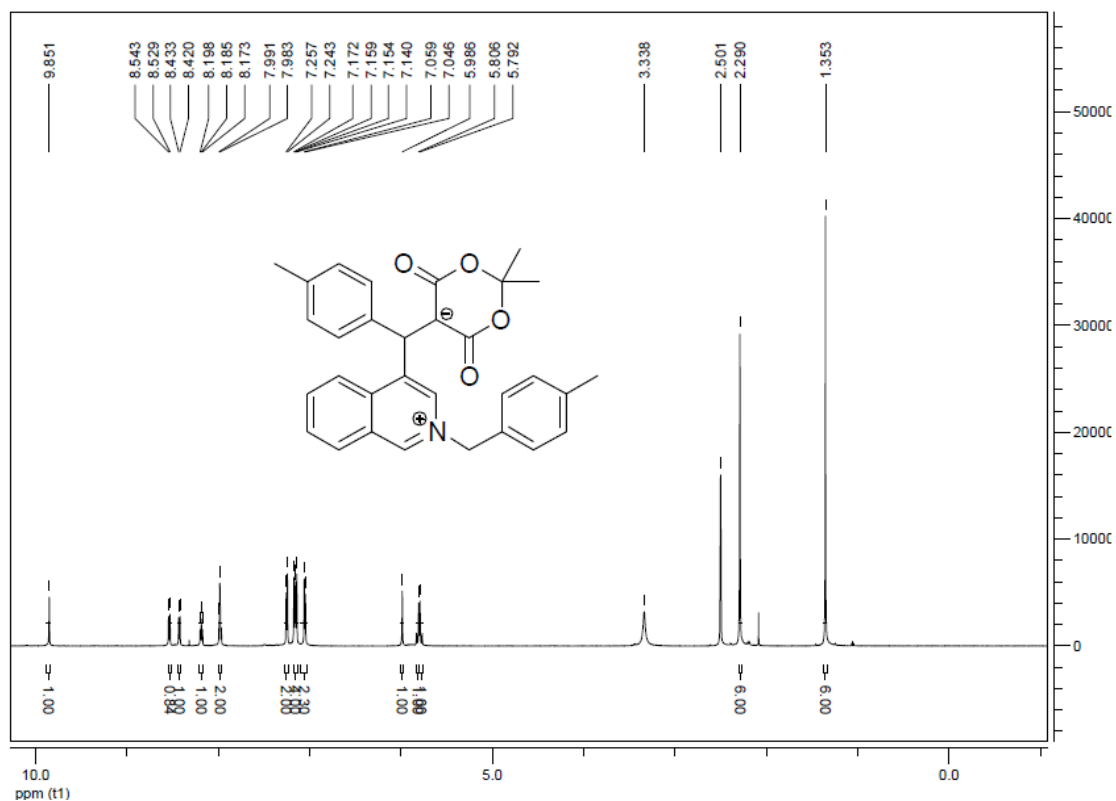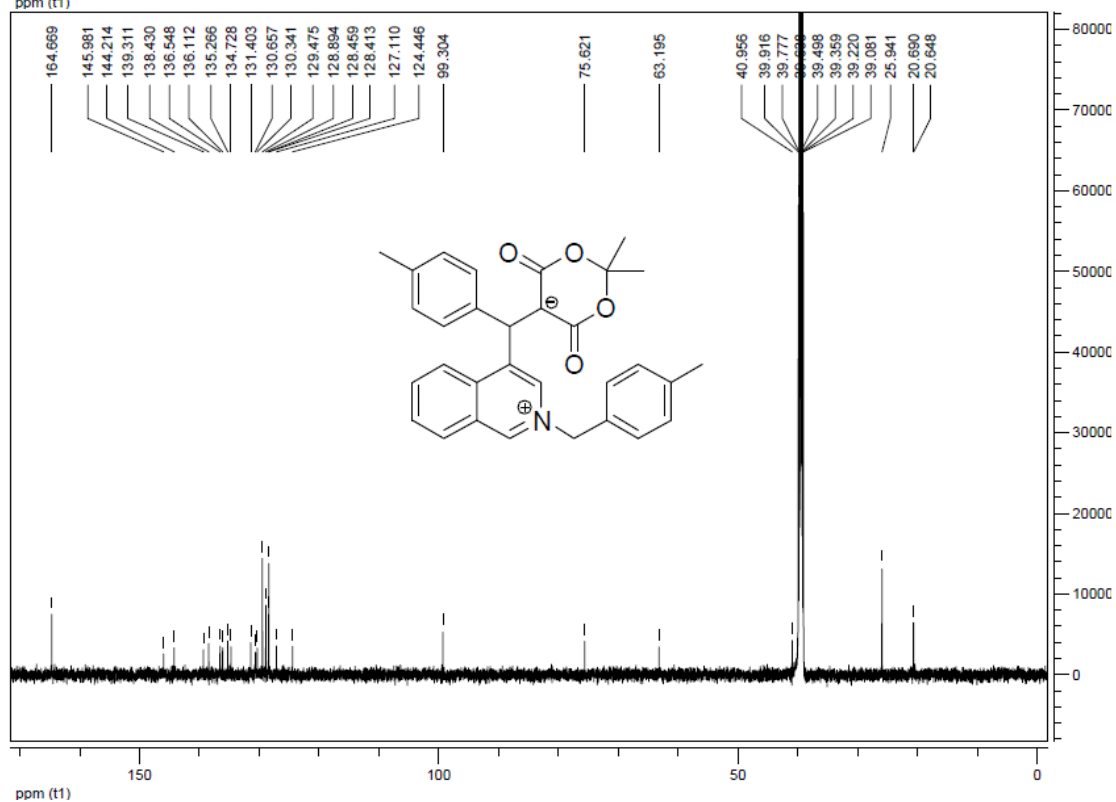



The optimized structure of intermediates at B3LYP/6-31G(d) level

| Intermediate A |                      |                      | Intermediate B |   |                      | Intermediate G |           |   |                      |               |                      |
|----------------|----------------------|----------------------|----------------|---|----------------------|----------------|-----------|---|----------------------|---------------|----------------------|
| C              | -5.97055<br>0        | 0.575734<br>8        | -0.43979       | C | 4.431838<br>3        | -2.14956<br>7  | -0.52544  | C | -4.91156<br>3        | -1.76287<br>7 | -0.45341<br>4        |
| C              | -4.76277<br>2        | 1.237110<br>6        | -0.46152       | C | 3.144315<br>2        | -1.67459<br>7  | -0.78809  | C | -3.78831<br>3        | -1.26914<br>2 | -1.08875<br>1        |
| C              | -3.56128<br>0        | 0.546452<br>1        | -0.13118       | C | 2.775229<br>0        | -0.38359<br>0  | -0.411100 | C | -3.00539<br>2        | -0.24614<br>9 | -0.49907<br>8        |
| C              | -3.64316<br>3        | -0.83949<br>8        | 0.221428       | C | 3.717944<br>0.464835 | 0.210605       |           | C | -3.40272<br>1        | 0.266815      | 0.773662             |
| C              | -4.89591<br>4        | -1.48719<br>9        | 0.237270       | C | 5.006749<br>-0.02217 | 0.466250       |           | C | -4.55585<br>6        | -0.24645<br>2 | 1.409541             |
| C              | -6.04599<br>0        | -0.79394<br>2        | -0.08830       | C | 5.361209<br>-1.32259 | 0.107827       |           | C | -5.29490<br>9        | -1.24491<br>2 | 0.802597             |
| H              | -2.20792<br>5        | 2.211507<br>3        | -0.47253       | H | 4.706281<br>-3.15951 | -0.81661       |           | H | -5.50421<br>5        | -2.54796<br>6 | -0.91475<br>3        |
| H              | -6.88062<br>9        | 1.111704<br>9        | -0.69484       | H | 2.419514<br>-2.31547 | -1.28519       |           | H | -3.46980<br>4        | -1.64550<br>6 | -2.05638<br>7        |
| H              | -4.71283<br>1        | 2.288349<br>7        | -0.73267       | C | 3.326028<br>1.837020 | 0.529748       |           | C | -1.84905<br>7        | 0.223109      | -1.23044<br>1        |
| C              | -2.31151<br>2        | 1.176301<br>4        | -0.17217       | H | 5.734477<br>0.629028 | 0.944767       |           | H | -4.85403<br>2        | 0.149396      | 2.377883             |
| H              | -4.94225<br>4        | -2.53845<br>3        | 0.510788       | H | 6.363716<br>-1.68682 | 0.314634       |           | H | -6.18043<br>4        | -1.63625<br>2 | 1.296965             |
| H              | -7.00905<br>3        | -1.29500<br>7        | -0.07490       | C | 2.097017<br>2.304471 | 0.254801       |           | C | -1.49981<br>0        | 1.732574      | 0.672590             |
| C              | -1.23002<br>6        | -0.80755<br>1        | 0.532730       | H | 4.067302<br>2.499182 | 0.968771       |           | H | -0.83875<br>5        | 2.500911      | 1.059188             |
| H              | -0.30544<br>3        | -1.25014<br>2        | 0.866877       | H | 1.805998<br>3.329577 | 0.466247       |           | N | -1.17920<br>6        | 1.203876      | -0.57356<br>3        |
| N              | -1.13974<br>2        | 0.537854<br>0.142259 |                | N | 1.080601<br>1.538204 | -0.37313       |           | C | 1.303115<br>1.009407 |               | -0.75315<br>7        |
| C              | 1.375121<br>0.711209 | 0.074305             |                | C | -1.02322<br>0.282301 | 0.304404       |           | C | 1.402607<br>-0.38392 |               | -0.89108<br>8        |
| C              | 1.760950<br>-0.59240 | -0.35859<br>9        |                | C | -1.74287<br>0.861005 | -0.75317       |           | C | 2.375000<br>1.722692 |               | -0.20412<br>4        |
| C              | 2.434790<br>1.614462 | 0.393921             |                | C | -1.70383<br>-0.51640 | 1.237582       |           | C | 2.551211<br>-1.05409 |               | -0.48621<br>3        |
| C              | 3.091049<br>-0.96814 | -0.42574<br>9        |                | C | -3.10957<br>0.642413 | -0.88388       |           | H | 0.562856<br>-0.92819 |               | -1.31479<br>7        |
| H              | 1.014719<br>-1.29979 | -0.70195<br>4        |                | H | -1.21814<br>1.501200 | -1.45488       |           | C | 3.534977<br>1.066991 |               | 0.204397<br>0.204397 |
| C              | 3.761153<br>1.242597 | 0.328979             |                | C | -3.07008<br>-0.74485 | 1.119273       |           | H | 2.308221<br>2.802454 |               | -0.09656<br>-0.09656 |

|   |          |          |          |   |          |          |          |   |          |          |          |  |          |
|---|----------|----------|----------|---|----------|----------|----------|---|----------|----------|----------|--|----------|
|   |          |          |          | 7 | 7        |          |          |   |          |          |          |  | 0        |
| H | 2.181457 | 2.622602 | 0.711224 | H | -1.15634 | -0.96324 | 2.063444 | C | 3.603019 | -0.31539 |          |  | 0.057349 |
|   |          |          |          |   | 5        | 6        |          |   |          | 2        |          |  |          |
| C | 4.092822 | -0.05984 | -0.07019 | C | -3.75621 | -0.16229 | 0.054201 | H | 2.648361 | -2.12822 | -0.58508 |  |          |
|   |          | 2        | 6        |   | 3        | 5        |          |   |          | 0        |          |  | 8        |
| H | 3.375056 | -1.95607 | -0.76800 | H | -3.68140 | 1.085064 | -1.69024 | H | 4.373645 | 1.602205 | 0.632111 |  |          |
|   |          | 0        | 6        |   | 8        |          | 5        |   |          |          |          |  |          |
| H | 4.554161 | 1.933842 | 0.587346 | H | -3.60937 | -1.35777 | 1.830805 | N | 4.822113 | -1.01758 | 0.488990 |  |          |
|   |          |          |          |   | 1        | 1        |          |   |          | 3        |          |  |          |
| N | 5.481619 | -0.46247 | -0.13141 | N | -5.19898 | -0.39768 | -0.07869 | O | 5.732431 | -0.34162 | 0.968862 |  |          |
|   |          | 7        | 7        |   | 7        | 0        | 4        |   |          | 2        |          |  |          |
| O | 6.343167 | 0.375208 | 0.164478 | O | -5.74524 | -1.10576 | 0.768660 | O | 4.859676 | -2.23927 | 0.345449 |  |          |
|   |          |          |          |   | 5        | 8        |          |   |          | 3        |          |  |          |
| O | 5.736877 | -1.62359 | -0.47629 | O | -5.78064 | 0.125601 | -1.03004 | C | 0.048534 | 1.724522 | -1.21810 |  |          |
|   |          | 4        | 0        |   | 3        |          | 0        |   |          |          |          |  | 1        |
| C | 0.051144 | 1.224325 | 0.152760 | C | 0.442676 | 0.477383 | 0.436619 | H | 0.127219 | 2.799028 | -1.02247 |  |          |
|   |          |          |          |   |          |          |          |   |          |          |          |  | 5        |
| H | -0.07936 | 2.299162 | 0.174090 | H | 0.846159 | 0.337187 | 1.438891 | H | -0.10107 | 1.573608 | -2.28828 |  |          |
|   | 3        |          |          |   |          |          |          |   | 5        |          |          |  | 5        |
| C | -2.41440 | -1.47275 | 0.560735 | C | 1.405487 | 0.136478 | -0.68056 | C | -2.58956 | 1.291238 | 1.349515 |  |          |
|   | 1        | 9        |          |   |          |          | 8        |   | 2        |          |          |  |          |
| H | -2.40992 | -2.50928 | 0.885563 | H | 0.941530 | -0.21975 | -1.60101 | H | -2.83687 | 1.715231 | 2.317972 |  |          |
|   | 4        | 5        |          |   |          | 5        | 5        |   | 9        |          |          |  |          |

The total energy (E), zero point energy (ZPE), sum of electronic and zero-point energy ( $E_0$ ) and relative energy ( $\Delta E$ ) of intermediate at B3LYP/6-31G(d) level

| species | E/ Hartree  | ZPE/Hartree | $E_0$ /Hartree | $\Delta E$ /kJ • mol <sup>-1</sup> |
|---------|-------------|-------------|----------------|------------------------------------|
| A       | -876.747888 | 0.247716    | -876.500172    | 0.00                               |
| B       | -876.741810 | 0.247753    | -876.494057    | 16.06                              |
| G       | -876.725534 | 0.247854    | -876.477680    | 59.05                              |

$$E_0 = E + ZPE$$

Mulliken atomic charges: Atomic charges with hydrogens summed into heavy atoms

| A |           |   | B         |   |           | G |           |   |           |   |           |
|---|-----------|---|-----------|---|-----------|---|-----------|---|-----------|---|-----------|
| C | -0.129953 | C | -0.132766 | C | -0.133335 | C | 0.012326  | C | 0.003523  | C | 0.002636  |
| C | -0.191413 | C | -0.198090 | C | -0.145909 | C | -0.052492 | C | -0.063226 | C | -0.002711 |
| C | 0.091624  | C | 0.160147  | C | -0.039376 | C | 0.091624  | C | 0.160147  | C | -0.039376 |
| C | 0.160490  | C | 0.106195  | C | 0.159479  | C | 0.160490  | C | 0.106195  | C | 0.159479  |
| C | -0.182349 | C | -0.199608 | C | -0.184965 | C | -0.041780 | C | -0.065700 | C | -0.053200 |
| C | -0.139532 | C | -0.127063 | C | -0.128103 | C | 0.001336  | C | 0.008688  | C | 0.009752  |
| H | 0.168341  | H | 0.136289  | H | 0.135971  | H | 0.000000  | H | 0.000000  | H | 0.000000  |
| H | 0.142279  | H | 0.134864  | H | 0.143198  | H | 0.000000  | H | 0.000000  | H | 0.000000  |
| H | 0.138921  | C | -0.154441 | C | -0.003959 | H | 0.000000  | C | -0.017709 | C | -0.003959 |
|   |           |   |           |   |           | C | 0.157950  | H | 0.000000  | H | 0.000000  |
|   |           |   |           |   |           | H | 0.000000  | H | 0.000000  | H | 0.000000  |
|   |           |   |           |   |           | H | 0.000000  | C | 0.144639  | C | 0.221319  |
|   |           |   |           |   |           | C | 0.249485  | H | 0.000000  | H | 0.000000  |
|   |           |   |           |   |           | H | 0.000000  | H | 0.000000  | N | -0.388674 |

|   |           |   |           |   |           |
|---|-----------|---|-----------|---|-----------|
| C | -0.010391 | H | 0.133908  | H | 0.131766  |
| H | 0.140569  | H | 0.135751  | H | 0.137855  |
| H | 0.140868  | C | -0.007423 | C | 0.065591  |
| C | 0.053724  | H | 0.136732  | H | 0.155729  |
| H | 0.195761  | H | 0.152062  | N | -0.388674 |
| N | -0.390048 | N | -0.412821 | C | 0.173013  |
| C | 0.204354  | C | 0.215358  | C | -0.182020 |
| C | -0.227518 | C | -0.205573 | C | -0.200223 |
| C | -0.208623 | C | -0.199321 | C | -0.148746 |
| C | -0.151527 | C | -0.149076 | H | 0.175393  |
| H | 0.135838  | H | 0.169333  | C | -0.147759 |
| C | -0.150418 | C | -0.155754 | H | 0.140633  |
| H | 0.130746  | H | 0.142910  | C | 0.275485  |
| C | 0.267592  | C | 0.275838  | H | 0.185696  |
| H | 0.173813  | H | 0.182405  | H | 0.183337  |
| H | 0.174255  | H | 0.182110  | N | 0.379840  |
| N | 0.359367  | N | 0.376839  | O | -0.396315 |
| O | -0.420046 | O | -0.399531 | O | -0.393214 |
| O | -0.422613 | O | -0.398377 | C | -0.227685 |
| C | -0.129651 | C | -0.113093 | H | 0.155018  |
| H | 0.144865  | H | 0.158794  | H | 0.197673  |
| C | -0.229706 | C | -0.108436 | C | -0.220506 |
| H | 0.160380  | H | 0.161837  | H | 0.145113  |

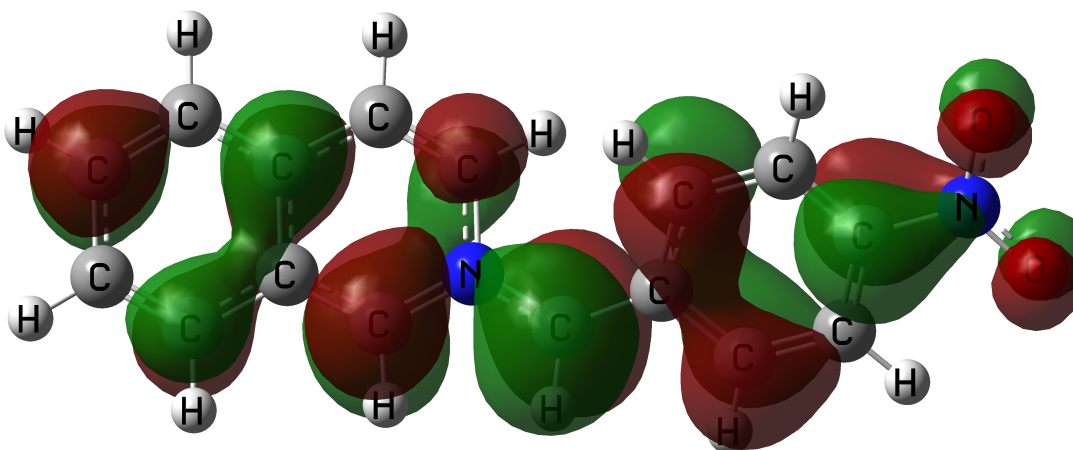

HOMO of intermediate A



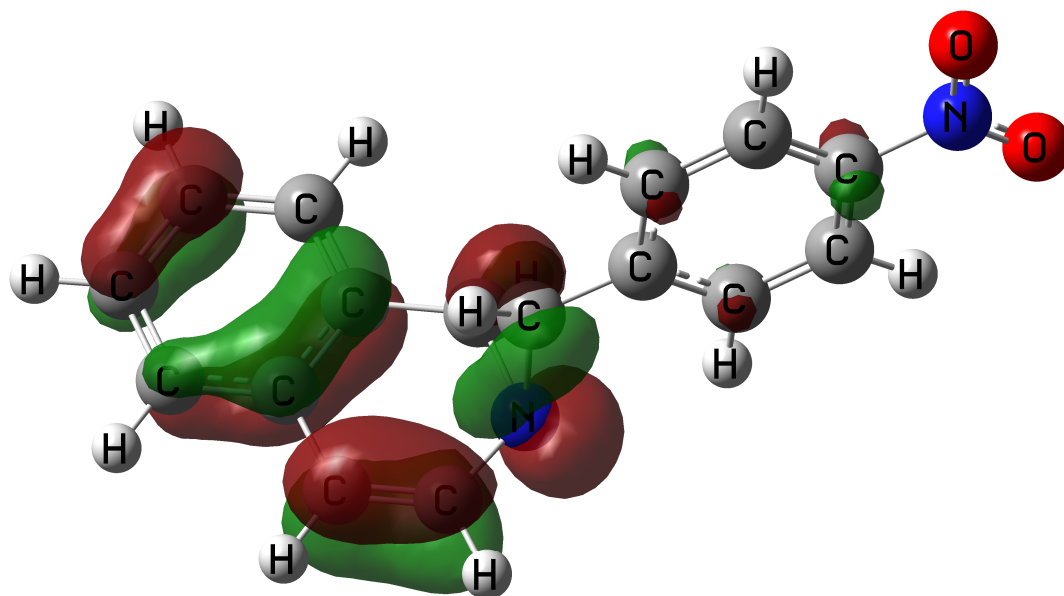

HOMO of intermediate B

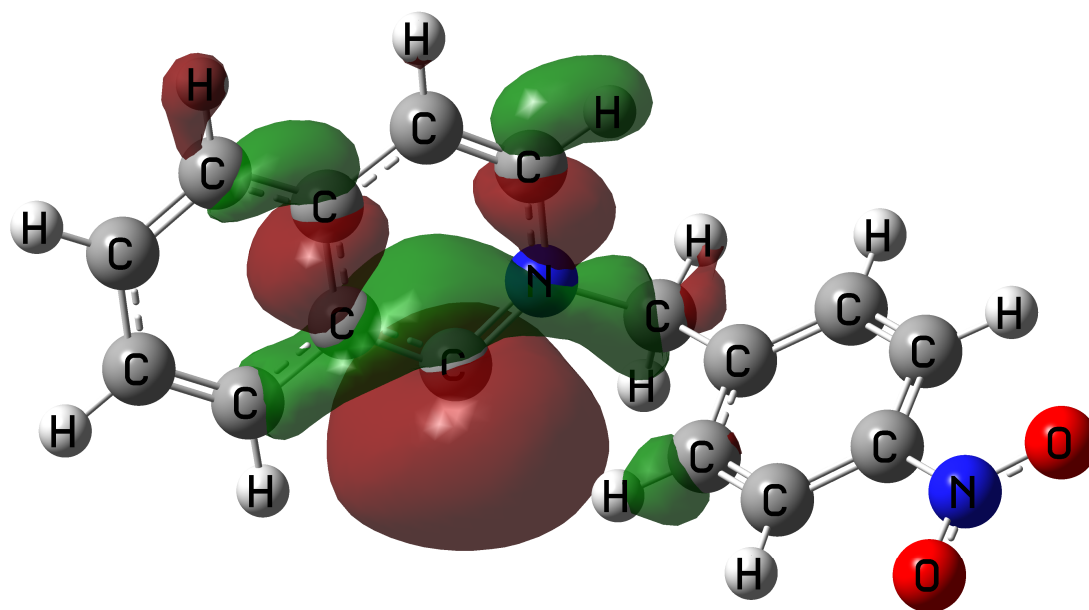

HOMO of intermediate G

The highest occupied molecular orbital (HOMO) of intermediates

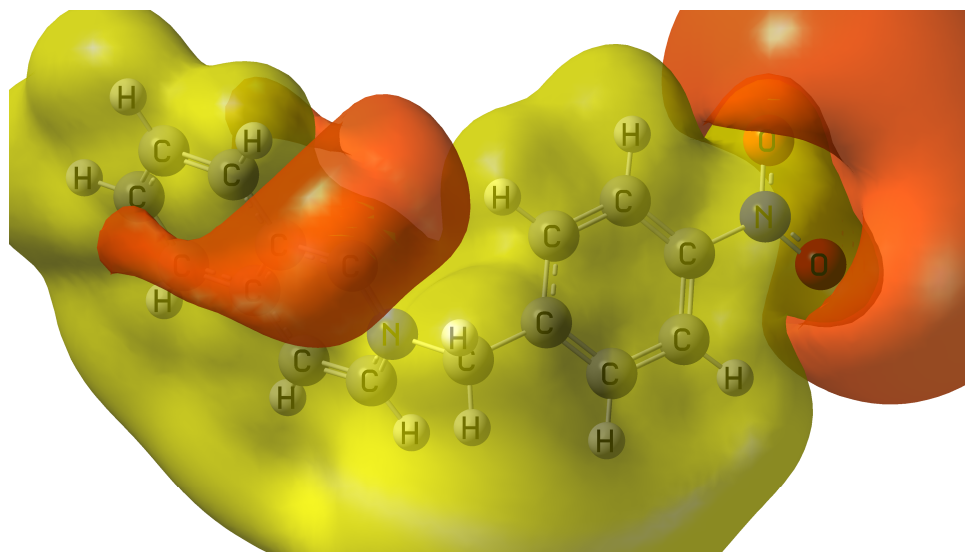

The ESP of intermediate G
